# Supplementary material for: Drought-Induced Root Pressure in Sorghum bicolor
Source: Front Plant Sci. 2021 Feb 3;12:571072. doi: 10.3389/fpls.2021.571072 (PMC7886691; doi:10.3389/fpls.2021.571072)
Supplement: Supplementary file 1 [file Table_1.xls]

## Sheet: Table_S1.csv
Supplementary Table 1. Transcripts with significant differential expression between the Deficit watering, Low root pressure group and the Control watering, Low root pressure group. Sequences were BLASTed against a database of known Poaceae genes and identified under the column "poaceae_function".
Deficit Low vs. Control Low
ID	gene	baseMean	log2FoldChange	lfcSE	stat	pvalue	padj	poaceae_function
20	Sobic.001G195600	9146.16	-9.95236	1.19395	-8.33566	7.71e-17	1.59e-12	NA
102	Sobic.003G228000	928.137	-8.85818	1.08951	-8.13044	4.28e-16	4.4e-12	XP_002458199.1 cytochrome P450 72A15 isoform X1 [Sorghum bicolor]
7	Sobic.001G064200	1355.9	-13.6092	1.73016	-7.86585	3.67e-15	2.51e-11	XP_002436560.1 mitochondrial outer membrane import complex protein METAXIN isoform X1 [Sorghum bicolor]
67	Sobic.002G240400	1077.08	11.1548	1.43617	7.76707	8.03e-15	4.13e-11	XP_002467260.1 IQ domain-containing protein IQM4 [Sorghum bicolor]
266	Sobic.010G136400	342.435	9.07066	1.26137	7.19114	6.43e-13	2.64e-09	NA
171	Sobic.005G167500	3344.59	9.09535	1.29787	7.00791	2.42e-12	8.29e-09	XP_021316934.1 probable disease resistance protein At1g59620 isoform X2 [Sorghum bicolor]
235	Sobic.008G183700	352.388	-9.08009	1.34176	-6.76731	1.31e-11	3.86e-08	XP_025808500.1 CBBY-like protein [Panicum hallii]
105	Sobic.003G250220	727.755	11.6057	1.75117	6.6274	3.42e-11	7.95e-08	XP_002439945.2 protein FAR1-RELATED SEQUENCE 5 [Sorghum bicolor]
108	Sobic.003G256600	322.285	-11.3091	1.70712	-6.62468	3.48e-11	7.95e-08	BAJ89970.1 predicted protein [Hordeum vulgare subsp. vulgare]
214	Sobic.007G072133	451.028	-8.54203	1.29741	-6.58392	4.58e-11	9.43e-08	XP_021320385.1 zinc finger BED domain-containing protein RICESLEEPER 2-like isoform X2 [Sorghum bicolor]
50	Sobic.002G055700	1808.09	-5.49143	0.86712	-6.33295	2.41e-10	4.49e-07	XP_002459438.1 xylanase inhibitor protein 1 [Sorghum bicolor]
253	Sobic.009G245200	834.461	6.31413	0.999078	6.31995	2.62e-10	4.49e-07	AAM92800.1 putative DNA helicase homolog [Oryza sativa Japonica Group]
169	Sobic.005G126701	222.641	-10.8821	1.74591	-6.2329	4.58e-10	6.73e-07	SPT19093.1 unnamed protein product [Triticum aestivum]
239	Sobic.009G004700	329.881	-8.15376	1.30769	-6.23522	4.51e-10	6.73e-07	XP_002439107.2 putative disease resistance RPP13-like protein 2 [Sorghum bicolor]
166	Sobic.005G110547	262.885	-10.5839	1.7135	-6.1768	6.54e-10	8.97e-07	NA
210	Sobic.007G055900	157.016	11.5146	1.87692	6.13484	8.52e-10	1.1e-06	XP_021320357.1 7-deoxyloganetin glucosyltransferase [Sorghum bicolor]
211	Sobic.007G060900	242.726	10.894	1.77901	6.12364	9.15e-10	1.11e-06	XP_002443946.2 putative disease resistance RPP13-like protein 3 [Sorghum bicolor]
49	Sobic.002G046900	621.007	5.59138	0.917963	6.09107	1.12e-09	1.15e-06	XP_002459392.1 uncharacterized protein LOC8081174 [Sorghum bicolor]
90	Sobic.003G141200	465.527	9.53234	1.56392	6.09514	1.09e-09	1.15e-06	XP_021313599.1 brassinosteroid LRR receptor kinase BRI1 [Sorghum bicolor]
157	Sobic.005G055900	442.251	-7.61924	1.24916	-6.09949	1.06e-09	1.15e-06	XP_015615692.1 putative receptor-like protein kinase At3g47110 isoform X1 [Oryza sativa Japonica Group]
206	Sobic.006G235650	560.321	-11.1027	1.84236	-6.02636	1.68e-09	1.64e-06	XP_021319334.1 protein FAR1-RELATED SEQUENCE 5 [Sorghum bicolor]
229	Sobic.008G109100	146.965	11.4176	1.91322	5.96772	2.41e-09	2.25e-06	XP_021301291.1 uncharacterized protein LOC8064588 isoform X1 [Sorghum bicolor]
208	Sobic.007G018900	512.28	6.47561	1.10545	5.85791	4.69e-09	4.19e-06	XP_002443769.1 28 kDa ribonucleoprotein
27	Sobic.001G279000	179.688	-11.2915	1.94388	-5.80877	6.29e-09	5.39e-06	XP_021319325.1 uncharacterized protein LOC8086263 [Sorghum bicolor]
111	Sobic.003G265701	181.074	10.5927	1.83525	5.77181	7.84e-09	6.45e-06	XP_021311607.1 receptor kinase-like protein Xa21 [Sorghum bicolor]
100	Sobic.003G217566	330.261	-10.8838	1.89964	-5.72939	1.01e-08	7.97e-06	XP_002458146.1 thrombospondin type-1 domain-containing protein 4 [Sorghum bicolor]
103	Sobic.003G235500	5617.64	-4.75775	0.835875	-5.69193	1.26e-08	9.57e-06	ACG27508.1 hypothetical protein [Zea mays]
177	Sobic.005G219300	160.215	-7.29075	1.30246	-5.59767	2.17e-08	1.6e-05	XP_002450008.2 disease resistance protein RPP13 isoform X1 [Sorghum bicolor]
277	Sobic.010G232400	317.434	-6.28638	1.13562	-5.53561	3.1e-08	2.2e-05	AVY91808.1 trehalose-phosphatase [Saccharum hybrid cultivar SP80-3280]
19	Sobic.001G195500	120.34	-10.1727	1.89119	-5.37899	7.49e-08	5.14e-05	NA
75	Sobic.002G351200	718.595	4.98153	0.935518	5.32489	1.01e-07	6.7e-05	XP_002460909.1 uncharacterized protein LOC8058348 [Sorghum bicolor]
245	Sobic.009G030001	392.502	-9.94786	1.88515	-5.27695	1.31e-07	8.44e-05	XP_021312672.1 uncharacterized protein LOC8082488 [Sorghum bicolor]
25	Sobic.001G262200	83.4339	-10.3826	1.98442	-5.23206	1.68e-07	0.000104498	XP_006664885.1 uncharacterized protein LOC102707831 [Oryza brachyantha]
165	Sobic.005G110451	85.3679	10.6371	2.03667	5.22278	1.76e-07	0.000106638	XP_002489328.2 flavonoid O-methyltransferase-like protein Os11g0303600 [Sorghum bicolor]
128	Sobic.004G101601	970.338	-24.8103	4.78492	-5.18511	2.16e-07	0.000126887	NA
115	Sobic.003G335601	236.076	-24.4286	4.72225	-5.17309	2.3e-07	0.000128017	XP_021311999.1 uncharacterized protein LOC110433755 [Sorghum bicolor]
161	Sobic.005G075500	353.865	-24.2636	4.68585	-5.17807	2.24e-07	0.000128017	XP_021316454.1 uncharacterized protein LOC110435329 isoform X1 [Sorghum bicolor]
132	Sobic.004G112600	421.765	-24.4597	4.75899	-5.13969	2.75e-07	0.000141525	XP_002453625.1 uncharacterized protein LOC8078341 [Sorghum bicolor]
147	Sobic.004G249600	377.955	6.66022	1.29456	5.14478	2.68e-07	0.000141525	PWZ37242.1 S-adenosylmethionine carrier 1
269	Sobic.010G151200	290.672	-24.0379	4.67654	-5.14011	2.75e-07	0.000141525	XP_021305874.1 uncharacterized protein LOC110431275 isoform X1 [Sorghum bicolor]
267	Sobic.010G140525	205.546	-10.03	1.95411	-5.1328	2.85e-07	0.000143226	XP_021305274.1 uncharacterized protein LOC110431046 isoform X2 [Sorghum bicolor]
12	Sobic.001G149201	145.049	-10.3371	2.01711	-5.12471	2.98e-07	0.000145952	XP_002466729.1 tankyrase [Sorghum bicolor]
59	Sobic.002G128600	215.378	7.21604	1.41154	5.11219	3.18e-07	0.000152345	XP_002459808.1 lecithin-cholesterol acyltransferase-like 1 [Sorghum bicolor]
16	Sobic.001G169000	498.586	-24.41	4.78498	-5.10137	3.37e-07	0.000157647	NA
113	Sobic.003G290050	77.7807	10.5025	2.06662	5.08198	3.74e-07	0.00017075	NA
5	Sobic.001G056900	190.766	-23.6059	4.65888	-5.06686	4.04e-07	0.000180376	NA
263	Sobic.010G106200	668.997	4.15729	0.821068	5.06327	4.12e-07	0.000180376	XP_002438183.1 signal recognition particle 9 kDa protein [Sorghum bicolor]
4	Sobic.001G053200	333.865	-23.429	4.66328	-5.02416	5.06e-07	0.0002167	XP_021302058.1 uncharacterized protein LOC110429789 [Sorghum bicolor]
138	Sobic.004G146100	93.7241	-23.9986	4.78507	-5.01531	5.29e-07	0.000218943	NA
145	Sobic.004G205200	124.414	6.93931	1.38495	5.01053	5.43e-07	0.000218943	XP_002452402.1 pentatricopeptide repeat-containing protein At3g04130
256	Sobic.010G026500	123.062	6.53837	1.30444	5.01241	5.38e-07	0.000218943	XP_002436433.1 uncharacterized protein At4g22758 [Sorghum bicolor]
156	Sobic.005G020700	124.666	10.7506	2.15845	4.98072	6.33e-07	0.000250603	XP_002450192.1 protein DETOXIFICATION 21 [Sorghum bicolor]
18	Sobic.001G186600	81.7046	-23.8113	4.78512	-4.97612	6.49e-07	0.000251786	XP_021313395.1 uncharacterized protein LOC110434056 [Sorghum bicolor]
174	Sobic.005G207800	77.2064	-23.7646	4.78515	-4.96633	6.82e-07	0.000259927	XP_021316513.1 uncharacterized protein LOC8070193 [Sorghum bicolor]
72	Sobic.002G305750	130.619	-10.0178	2.01862	-4.9627	6.95e-07	0.000260013	NA
1	Sobic.001G015000	263.1	5.51963	1.11565	4.94746	7.52e-07	0.000271346	XP_002463529.1 keratin
88	Sobic.003G131100	209.172	-8.03716	1.6239	-4.94931	7.45e-07	0.000271346	XP_002455459.1 cyclic dof factor 2 [Sorghum bicolor]
231	Sobic.008G139900	115.076	-10.4265	2.1134	-4.9335	8.08e-07	0.000286463	XP_021301464.1 uncharacterized protein LOC110429606 isoform X1 [Sorghum bicolor]
221	Sobic.008G040600	92.9609	-9.97063	2.04958	-4.86473	1.15e-06	0.00039962	XP_002441853.1 G-box-binding factor 3 [Sorghum bicolor]
15	Sobic.001G167300	171.923	6.16969	1.27301	4.84652	1.26e-06	0.000430776	RLN40538.1 hypothetical protein [Panicum miliaceum]
273	Sobic.010G191750	122.186	9.58087	2.0259	4.7292	2.25e-06	0.000760133	XP_021306067.1 LOW QUALITY PROTEIN: probably inactive leucine-rich repeat receptor-like protein kinase At2g25790 [Sorghum bicolor]
52	Sobic.002G065900	90.1902	9.67022	2.04943	4.7185	2.38e-06	0.000775795	XP_021309015.1 subtilisin-like protease SBT4.3 [Sorghum bicolor]
265	Sobic.010G129450	94.5809	10.2398	2.16951	4.71986	2.36e-06	0.000775795	XP_002438304.1 uncharacterized protein LOC8072849 [Sorghum bicolor]
176	Sobic.005G210850	106.019	-6.2947	1.35435	-4.64777	3.36e-06	0.0010785	XP_021316681.1 uncharacterized protein LOC110435459 isoform X2 [Sorghum bicolor]
94	Sobic.003G166875	539.237	-7.84623	1.69254	-4.63577	3.56e-06	0.00112543	XP_021313435.1 uncharacterized protein LOC8069552 isoform X1 [Sorghum bicolor]
159	Sobic.005G072000	138.713	8.32393	1.8015	4.62056	3.83e-06	0.00119281	XP_002449167.1 disease resistance protein RPM1 [Sorghum bicolor]
114	Sobic.003G335501	106.99	-9.79469	2.12354	-4.61243	3.98e-06	0.00120395	XP_021301586.1 uncharacterized protein LOC8068817 isoform X1 [Sorghum bicolor]
180	Sobic.005G226200	51.1504	9.73783	2.11085	4.61323	3.96e-06	0.00120395	XP_002450044.2 jasmonate O-methyltransferase [Sorghum bicolor]
233	Sobic.008G170600	57.2705	10.054	2.18232	4.60701	4.09e-06	0.00121786	XP_002443559.2 putative pentatricopeptide repeat-containing protein At1g10330 [Sorghum bicolor]
86	Sobic.003G097200	432.38	-4.47212	0.976487	-4.5798	4.65e-06	0.00135154	XP_021313022.1 rust resistance kinase Lr10-like [Sorghum bicolor]
109	Sobic.003G257800	57.3647	10.0632	2.19752	4.57932	4.66e-06	0.00135154	NA
232	Sobic.008G155800	63.3861	-9.11873	1.99293	-4.57555	4.75e-06	0.00135704	XP_021302361.1 kinase D-interacting substrate of 220 kDa-like [Sorghum bicolor]
237	Sobic.009G002700	150.005	8.05913	1.76321	4.57072	4.86e-06	0.0013697	XP_002439100.1 serpin-ZXA isoform X1 [Sorghum bicolor]
14	Sobic.001G150033	77.1364	-8.91385	1.95569	-4.5579	5.17e-06	0.00143627	XP_015619298.1 uncharacterized protein LOC107279689 [Oryza sativa Japonica Group]
153	Sobic.004G348500	107.149	-9.53851	2.0998	-4.54259	5.56e-06	0.00152412	XP_002454793.1 protein KINESIN LIGHT CHAIN-RELATED 2 [Sorghum bicolor]
194	Sobic.006G082850	61.4184	-9.96486	2.20569	-4.5178	6.25e-06	0.00165384	NA
238	Sobic.009G003600	77.7261	6.54726	1.44815	4.52112	6.15e-06	0.00165384	NP_001105831.1 12-oxo-phytodienoic acid reductase [Zea mays]
243	Sobic.009G018100	116.844	-9.32764	2.06499	-4.51704	6.27e-06	0.00165384	NA
23	Sobic.001G228600	83.5395	-9.21698	2.04627	-4.50429	6.66e-06	0.00173406	NA
92	Sobic.003G156766	82.032	-8.40245	1.87094	-4.49104	7.09e-06	0.0018225	XP_021312466.1 myosin-17 [Sorghum bicolor]
26	Sobic.001G267233	58.2144	-9.88656	2.20654	-4.48058	7.44e-06	0.00186748	NA
120	Sobic.003G418200	68.9434	-9.33163	2.08152	-4.4831	7.36e-06	0.00186748	XP_021312783.1 spermatogenesis-associated protein 20 isoform X2 [Sorghum bicolor]
209	Sobic.007G053900	106.636	6.28372	1.40496	4.47252	7.73e-06	0.00191587	XP_021311848.1 uncharacterized protein LOC8069551 [Sorghum bicolor]
204	Sobic.006G202800	76.0633	-9.13571	2.04806	-4.46066	8.17e-06	0.00200097	NA
44	Sobic.002G016100	131.119	-8.78684	1.97921	-4.43957	9.01e-06	0.00217133	XP_021310083.1 uncharacterized protein LOC8084273 [Sorghum bicolor]
252	Sobic.009G245101	1251.59	6.86812	1.54755	4.43806	9.08e-06	0.00217133	NA
136	Sobic.004G127300	53.2247	9.95578	2.24547	4.43371	9.26e-06	0.00219013	XP_021314523.1 uncharacterized protein LOC110434571 isoform X5 [Sorghum bicolor]
43	Sobic.001G542150	50.2529	-9.66638	2.18775	-4.41842	9.94e-06	0.00232419	NA
240	Sobic.009G004800	89.8477	-7.2013	1.63419	-4.40665	1.05e-05	0.00242644	XP_015615725.1 unnamed protein product [Oryza sativa Japonica Group]
241	Sobic.009G006400	134.694	-9.0958	2.06542	-4.40385	1.06e-05	0.0024307	XP_021302594.1 WAT1-related protein At5g64700 isoform X2 [Sorghum bicolor]
80	Sobic.003G032800	53.9448	-9.77707	2.2259	-4.39241	1.12e-05	0.00253407	XP_021313641.1 uncharacterized protein LOC110434172 [Sorghum bicolor]
63	Sobic.002G182150	51.5401	9.9093	2.26015	4.38435	1.16e-05	0.00260114	XP_021302777.1 uncharacterized protein LOC8058288 [Sorghum bicolor]
38	Sobic.001G379000	61.1287	-7.52819	1.719	-4.3794	1.19e-05	0.00263237	XP_002467891.1 alanine--glyoxylate aminotransferase 2 homolog 3
201	Sobic.006G175700	177.482	6.89103	1.58518	4.34715	1.38e-05	0.00301821	XP_021318741.1 anthocyanin regulatory R-S protein isoform X2 [Sorghum bicolor]
135	Sobic.004G122500	69.6037	8.77348	2.02317	4.33651	1.45e-05	0.00313464	RLN03561.1 uncharacterized protein [Panicum miliaceum]
57	Sobic.002G118500	49.358	9.84603	2.28286	4.31303	1.61e-05	0.00345068	XP_002459768.2 LOW QUALITY PROTEIN: FBD-associated F-box protein At5g60610 [Sorghum bicolor]
163	Sobic.005G108225	50.8234	-9.6913	2.26131	-4.28571	1.82e-05	0.00382361	XP_021302010.1 uncharacterized protein LOC110429779 [Sorghum bicolor]
175	Sobic.005G209400	89.9985	-9.90739	2.31056	-4.28787	1.8e-05	0.00382361	XP_002449962.2 putative receptor-like protein kinase At4g00960 [Sorghum bicolor]
258	Sobic.010G047700	44.9357	9.39371	2.1995	4.27084	1.95e-05	0.00404643	PWZ07112.1 Soluble starch synthase 1
48	Sobic.002G040300	69.7153	6.80338	1.59673	4.26081	2.04e-05	0.00418999	XP_002461488.1 uncharacterized protein LOC8086433 [Sorghum bicolor]
73	Sobic.002G321100	47.473	9.79087	2.31019	4.23813	2.25e-05	0.00459055	XP_021308052.1 putative disease resistance protein RGA3 [Sorghum bicolor]
202	Sobic.006G201400	247.692	-4.07278	0.962482	-4.23153	2.32e-05	0.00468096	NA
216	Sobic.007G083200	51.8859	-9.72162	2.30004	-4.22672	2.37e-05	0.00473569	NA
224	Sobic.008G060150	138.513	-8.34137	1.98707	-4.19782	2.69e-05	0.00533055	NA
6	Sobic.001G063900	142.007	7.14302	1.70256	4.19545	2.72e-05	0.00533533	XP_021304155.1 RING-H2 finger protein ATL70 [Sorghum bicolor]
123	Sobic.004G016100	47.5594	9.07607	2.17183	4.179	2.93e-05	0.00568203	XP_021316278.1 uncharacterized protein LOC8068240 isoform X1 [Sorghum bicolor]
60	Sobic.002G164960	125.732	-9.38227	2.24662	-4.17618	2.96e-05	0.00569926	NA
143	Sobic.004G171600	46.1283	9.74809	2.33602	4.17295	3.01e-05	0.00572701	XP_002452243.1 transcription factor bHLH95 [Sorghum bicolor]
46	Sobic.002G021500	136.25	7.6247	1.8329	4.1599	3.18e-05	0.00600875	XP_015645620.1 uncharacterized protein LOC107277256 isoform X2 [Oryza sativa Japonica Group]
227	Sobic.008G103300	177.776	-6.13367	1.47983	-4.14485	3.4e-05	0.00635888	XP_002443218.1 uncharacterized protein LOC8064295 [Sorghum bicolor]
78	Sobic.003G032100	99.9429	7.40151	1.78806	4.13941	3.48e-05	0.00645298	RLN22265.1 hypothetical protein [Panicum miliaceum]
54	Sobic.002G073300	46.6846	-9.56894	2.31625	-4.13121	3.61e-05	0.00662776	NA
106	Sobic.003G251100	192.963	-7.46526	1.81542	-4.11214	3.92e-05	0.00713621	XP_021315048.1 uncharacterized protein LOC110434701 [Sorghum bicolor]
230	Sobic.008G134500	87.3073	-10.1236	2.46405	-4.10852	3.98e-05	0.00718561	XP_021321909.1 probable LRR receptor-like serine/threonine-protein kinase At1g05700 [Sorghum bicolor]
228	Sobic.008G104601	426.916	-7.34139	1.7885	-4.10476	4.05e-05	0.00723968	NA
71	Sobic.002G280600	123.786	6.38006	1.55647	4.09906	4.15e-05	0.0073564	XP_021309495.1 mediator of RNA polymerase II transcription subunit 4 [Sorghum bicolor]
41	Sobic.001G534900	82.739	-6.91318	1.68931	-4.0923	4.27e-05	0.00750966	XP_021306974.1 uncharacterized protein LOC110431760 [Sorghum bicolor]
141	Sobic.004G164200	251.725	5.45944	1.33539	4.08827	4.35e-05	0.00757645	RLM78761.1 hypothetical protein [Panicum miliaceum]
79	Sobic.003G032600	114.351	-5.33142	1.31022	-4.06909	4.72e-05	0.00815861	XP_021312149.1 uncharacterized protein LOC110433806 isoform X3 [Sorghum bicolor]
104	Sobic.003G247800	57.546	9.31346	2.29734	4.05401	5.03e-05	0.00863058	XP_021312893.1 cold-regulated 413 inner membrane protein 1
200	Sobic.006G148800	526.721	-4.24927	1.05343	-4.03373	5.49e-05	0.009333	XP_002448193.1 phenylalanine ammonia-lyase [Sorghum bicolor]
127	Sobic.004G098200	47.2847	-9.58614	2.38199	-4.02442	5.71e-05	0.00955215	XP_008646970.1 E3 ubiquitin-protein ligase RNF38 [Zea mays]
195	Sobic.006G088580	1280.71	-6.18034	1.53558	-4.02475	5.7e-05	0.00955215	NA
207	Sobic.006G275100	250.893	4.58421	1.13964	4.02251	5.76e-05	0.00955243	OEL30172.1 Mitochondrial carrier protein MTM1 [Dichanthelium oligosanthes]
190	Sobic.006G056800	152.37	-5.3706	1.33604	-4.0198	5.82e-05	0.00958569	XP_021307628.1 uncharacterized protein LOC110432022 [Sorghum bicolor]
40	Sobic.001G473100	165.717	5.69153	1.42009	4.00786	6.13e-05	0.0100033	NA
199	Sobic.006G147400	38.273	8.89545	2.2235	4.00065	6.32e-05	0.0102318	XP_002454729.1 protein CUP-SHAPED COTYLEDON 1 [Sorghum bicolor]
170	Sobic.005G146900	78.3431	5.31936	1.33725	3.97784	6.95e-05	0.0111764	RLM58613.1 hypothetical protein [Panicum miliaceum]
37	Sobic.001G353800	39.5106	9.5252	2.40702	3.95726	7.58e-05	0.0120895	XP_002465196.2 probable serine/threonine-protein kinase PBL22 [Sorghum bicolor]
64	Sobic.002G185300	430.102	4.14123	1.04829	3.95048	7.8e-05	0.012342	XP_021307895.1 uncharacterized protein LOC8056178 isoform X2 [Sorghum bicolor]
62	Sobic.002G182000	464.347	3.05432	0.776548	3.9332	8.38e-05	0.0131626	XP_021307898.1 zinc finger CCCH domain-containing protein 59 [Sorghum bicolor]
278	Sobic.010G235550	361.138	4.49542	1.1438	3.93027	8.49e-05	0.0132235	NA
152	Sobic.004G343733	68.5843	8.88188	2.26245	3.92578	8.64e-05	0.0133709	XP_021313982.1 receptor-like serine/threonine-protein kinase ALE2 isoform X3 [Sorghum bicolor]
9	Sobic.001G078000	40.6422	9.56509	2.44405	3.91363	9.09e-05	0.0139569	XP_002466396.1 uncharacterized protein LOC8083970 [Sorghum bicolor]
150	Sobic.004G326900	276.581	3.55736	0.909382	3.91184	9.16e-05	0.0139569	XP_002452964.1 UDP-glucuronate 4-epimerase 1 [Sorghum bicolor]
186	Sobic.006G034275	54.6243	9.04346	2.31409	3.90799	9.31e-05	0.0140771	XP_020180298.1 uncharacterized protein LOC109765942 [Aegilops tauschii subsp. tauschii]
274	Sobic.010G204100	237.334	4.3062	1.10311	3.90369	9.47e-05	0.0142252	XP_002437335.1 uncharacterized protein LOC8067703 [Sorghum bicolor]
215	Sobic.007G073900	299.924	3.33905	0.857972	3.89179	9.95e-05	0.014833	XP_002444013.1 histone-lysine N-methyltransferase ASHR2 [Sorghum bicolor]
61	Sobic.002G177900	88.9754	-6.12891	1.58538	-3.86589	0.000110685	0.0162892	XP_002460093.2 uncharacterized protein LOC8054603 [Sorghum bicolor]
234	Sobic.008G178000	84.1313	9.69103	2.50705	3.86551	0.000110859	0.0162892	NA
10	Sobic.001G079401	42.5242	9.63015	2.49333	3.86237	0.000112292	0.0163365	NA
173	Sobic.005G181700	48.9117	8.1828	2.11916	3.86133	0.00011277	0.0163365	XP_002451095.2 disease resistance protein RPM1 [Sorghum bicolor]
242	Sobic.009G015200	99.4398	-6.54807	1.69774	-3.85692	0.000114823	0.0165177	AAP06925.1 putative reverse transcriptase [Oryza sativa Japonica Group]
178	Sobic.005G220101	58.0115	-6.43811	1.67482	-3.84406	0.000121018	0.0172879	XP_002450015.2 uncharacterized protein LOC8086003 [Sorghum bicolor]
74	Sobic.002G326400	54.9172	-7.0785	1.84246	-3.84188	0.000122094	0.0173213	XP_021309271.1 cysteine-rich receptor-like protein kinase 15 [Sorghum bicolor]
131	Sobic.004G112500	41.6305	-8.60553	2.24416	-3.83463	0.000125755	0.0177185	XP_008674612.1 unconventional prefoldin RPB5 interactor-like isoform X1 [Zea mays]
212	Sobic.007G061900	47.0493	7.76965	2.031	3.82553	0.000130489	0.0182605	XP_021320994.1 ubiquitin carboxyl-terminal hydrolase 51-like [Sorghum bicolor]
98	Sobic.003G202200	116.959	-5.51308	1.44254	-3.82179	0.000132486	0.0184146	XP_002458070.1 cytokinin riboside 5'-monophosphate phosphoribohydrolase LOG [Sorghum bicolor]
246	Sobic.009G040900	604.812	-3.15418	0.826522	-3.81621	0.000135516	0.0187094	XP_021302675.1 sucrose-phosphatase 2 [Sorghum bicolor]
34	Sobic.001G330850	43.8086	-8.7451	2.29369	-3.81267	0.000137472	0.0188529	NA
56	Sobic.002G103100	76.4555	-6.39363	1.67838	-3.8094	0.000139305	0.0189778	XP_021319551.1 uncharacterized protein LOC110436565 isoform X3 [Sorghum bicolor]
219	Sobic.007G129401	38.357	-9.28461	2.43876	-3.8071	0.000140606	0.019029	NA
84	Sobic.003G089700	77.2827	9.7355	2.55997	3.80298	0.000142967	0.0192221	NA
99	Sobic.003G212700	27.7919	8.90929	2.34406	3.8008	0.000144232	0.0192548	XP_021311919.1 protein GAMETE EXPRESSED 3 [Sorghum bicolor]
154	Sobic.004G350500	71.4869	9.71348	2.55662	3.79934	0.000145083	0.0192548	XP_002453066.1 probable pectinesterase/pectinesterase inhibitor 17 [Sorghum bicolor]
197	Sobic.006G137000	369.064	3.68489	0.970825	3.79563	0.000147269	0.0194197	XP_021318459.1 probable protein phosphatase 2C 42 isoform X1 [Sorghum bicolor]
270	Sobic.010G156000	40.148	-8.18495	2.16275	-3.78452	0.000154007	0.0201789	XP_002438500.1 GDSL esterase/lipase At5g45910 [Sorghum bicolor]
96	Sobic.003G181201	44.9955	6.95482	1.84655	3.76638	0.000165628	0.021503	XP_021309056.1 uncharacterized protein LOC8084580 [Sorghum bicolor]
118	Sobic.003G384900	48.3905	6.55036	1.73956	3.76552	0.000166204	0.021503	XP_021310811.1 pectin acetylesterase 5 [Sorghum bicolor]
70	Sobic.002G255901	46.8803	8.20543	2.18059	3.76294	0.000167927	0.0215901	XP_002462619.2 uncharacterized protein LOC8058965 [Sorghum bicolor]
151	Sobic.004G341600	56.3004	-7.37485	1.96176	-3.7593	0.000170392	0.0216367	XP_002454762.1 5-pentadecatrienyl resorcinol O-methyltransferase-like [Sorghum bicolor]
264	Sobic.010G117900	84.5922	-7.96736	2.11922	-3.75957	0.000170203	0.0216367	XP_002436875.1 probable aldo-keto reductase 3 [Sorghum bicolor]
251	Sobic.009G244450	42.3795	-9.42797	2.518	-3.74422	0.000180952	0.0228366	XP_002444779.2 DNA damage-repair/toleration protein DRT100 [Sorghum bicolor]
77	Sobic.002G420800	113.416	-7.07135	1.88942	-3.7426	0.000182122	0.0228441	XP_002461229.2 ricin B-like lectin R40C1 [Sorghum bicolor]
97	Sobic.003G191000	115.924	-5.65232	1.51378	-3.73392	0.000188523	0.0235037	XP_002458014.1 thiamine thiazole synthase 1
85	Sobic.003G097100	207.754	-3.60265	0.966221	-3.7286	0.000192546	0.0238606	XP_021313021.1 rust resistance kinase Lr10-like isoform X3 [Sorghum bicolor]
8	Sobic.001G065800	381.111	-3.76447	1.01446	-3.71082	0.000206587	0.0254473	XP_002463778.1 probable glutathione S-transferase GSTU1 [Sorghum bicolor]
160	Sobic.005G075100	41.5701	-8.79809	2.37438	-3.70542	0.00021104	0.0258411	XP_021317014.1 putative disease resistance protein RGA1 [Sorghum bicolor]
220	Sobic.008G006100	182.333	-6.36902	1.72006	-3.70278	0.000213249	0.0259571	NA
185	Sobic.006G033320	157.728	5.37899	1.45328	3.70127	0.00021452	0.0259582	AAD22154.1 hypothetical protein [Sorghum bicolor]
184	Sobic.006G032200	891.068	3.06041	0.828162	3.69542	0.000219522	0.0264081	NA
158	Sobic.005G070000	60.7063	9.61364	2.60297	3.69334	0.000221331	0.026471	NA
196	Sobic.006G112200	36.8451	8.65627	2.34469	3.69186	0.00022262	0.0264712	XP_021319613.1 uncharacterized protein LOC110436584 [Sorghum bicolor]
66	Sobic.002G201800	64.7415	6.43144	1.74365	3.68849	0.000225592	0.0266704	NA
218	Sobic.007G093000	39.8571	-9.34138	2.53363	-3.68695	0.000226958	0.0266786	XP_021320172.1 indole-2-monooxygenase [Sorghum bicolor]
133	Sobic.004G112800	460.522	-5.5265	1.5002	-3.68385	0.000229736	0.0267	NA
168	Sobic.005G119900	37.253	-8.05079	2.1846	-3.68524	0.000228483	0.0267	XP_021316826.1 berberine bridge enzyme-like 8 [Sorghum bicolor]
182	Sobic.005G230100	49.0451	8.75576	2.37911	3.68026	0.000232995	0.0269266	XP_021316797.1 scarecrow-like protein 34 [Sorghum bicolor]
225	Sobic.008G079600	65.4315	-9.70259	2.66641	-3.63882	0.000273894	0.0314764	AAM92802.1 putative gag-pol precursor [Oryza sativa Japonica Group]
213	Sobic.007G067400	74.725	-6.47237	1.78021	-3.63573	0.000277191	0.0316783	XP_002443982.2 germin-like protein 12-2 [Sorghum bicolor]
189	Sobic.006G045700	32.0912	8.27098	2.28715	3.61628	0.000298867	0.0337802	NA
226	Sobic.008G085200	38.9584	-8.29629	2.29401	-3.61651	0.000298607	0.0337802	NA
117	Sobic.003G374500	511.65	5.00546	1.3854	3.61302	0.00030265	0.0338359	NA
164	Sobic.005G108900	125.445	4.32472	1.19685	3.61343	0.000302172	0.0338359	NA
254	Sobic.009G256500	71.6698	8.69507	2.41201	3.60491	0.000312262	0.0347219	XP_021303895.1 ATP-dependent zinc metalloprotease FTSH 5
110	Sobic.003G258700	45.6538	9.51446	2.64157	3.60183	0.000315989	0.0349474	XP_021313223.1 uncharacterized protein LOC8061876 [Sorghum bicolor]
119	Sobic.003G395000	32.3961	9.23807	2.57309	3.59026	0.000330347	0.0361466	XP_002456807.1 cysteine proteinase EP-B 2 [Sorghum bicolor]
187	Sobic.006G037200	362.619	4.73806	1.31955	3.59067	0.000329825	0.0361466	NA
47	Sobic.002G022500	62.6869	-8.55548	2.38838	-3.58212	0.000340816	0.0370581	NA
181	Sobic.005G226450	32.0577	9.1674	2.56294	3.57691	0.000347685	0.0370581	NA
223	Sobic.008G049701	38.6892	8.11294	2.26637	3.57971	0.000343971	0.0370581	XP_008673376.1 uncharacterized protein LOC100502303 isoform X19 [Zea mays]
247	Sobic.009G072400	42.0149	-8.01197	2.23893	-3.57848	0.000345598	0.0370581	XP_002439417.1 ABC transporter C family member 8 [Sorghum bicolor]
276	Sobic.010G214500	86.5519	-8.76247	2.44926	-3.5776	0.000346768	0.0370581	NA
222	Sobic.008G043700	65.241	-5.53779	1.55401	-3.56355	0.000365869	0.0387953	XP_002441862.1 uncharacterized protein LOC8073466 [Sorghum bicolor]
17	Sobic.001G185800	382.786	3.71917	1.05145	3.53719	0.000404405	0.0420365	XP_002464323.1 protein DETOXIFICATION 40 [Sorghum bicolor]
21	Sobic.001G207800	72.1297	-8.03047	2.26989	-3.53782	0.00040345	0.0420365	XP_002467019.1 WAT1-related protein At3g02690
144	Sobic.004G172800	95.0895	-8.48385	2.39856	-3.53706	0.00040461	0.0420365	XP_002453966.2 uncharacterized protein LOC8064251 [Sorghum bicolor]
268	Sobic.010G143000	33.0094	-9.06777	2.56168	-3.53977	0.00040047	0.0420365	XP_021310650.1 uncharacterized protein LOC110433188 isoform X1 [Sorghum bicolor]
11	Sobic.001G148300	27.2386	8.32308	2.35489	3.53438	0.000408734	0.0422515	XP_002466725.1 glucan endo-1
126	Sobic.004G098100	2234.94	-2.62829	0.744105	-3.53215	0.000412199	0.0423968	XP_002453558.2 uncharacterized protein LOC8073795 [Sorghum bicolor]
91	Sobic.003G149900	33.0993	-8.06171	2.29163	-3.51789	0.000434989	0.0445182	NA
28	Sobic.001G282800	27.3355	-8.44614	2.4072	-3.5087	0.000450303	0.0456315	XP_021311179.1 4-coumarate--CoA ligase-like 3 isoform X2 [Sorghum bicolor]
83	Sobic.003G081000	153.927	-5.39596	1.53754	-3.50947	0.000448998	0.0456315	XP_021315150.1 uncharacterized protein LOC110434754 [Sorghum bicolor]
53	Sobic.002G066600	418.368	-4.26377	1.21663	-3.50458	0.000457326	0.0461159	NA
139	Sobic.004G149600	44.5195	-7.03522	2.00962	-3.50077	0.00046391	0.0465517	XP_021319551.1 uncharacterized protein LOC110436565 isoform X3 [Sorghum bicolor]
193	Sobic.006G077700	156.303	5.71643	1.63827	3.4893	0.000484281	0.0483599	XP_021316058.1 uncharacterized protein LOC110435063 [Sorghum bicolor]
192	Sobic.006G076201	42.8656	-6.12069	1.75864	-3.48035	0.00050075	0.049763	XP_025823156.1 extensin-like [Panicum hallii]
3	Sobic.001G039600	132.921	-3.83726	1.10906	-3.45994	0.000540297	0.0531792	NA
188	Sobic.006G044301	86.3794	-5.77895	1.66993	-3.4606	0.000538976	0.0531792	NP_001339331.1 uncharacterized LOC100277195 [Zea mays]
2	Sobic.001G037000	166.721	-3.24147	0.939084	-3.45173	0.000556998	0.0542028	OEL15054.1 PHD finger protein ALFIN-LIKE 2 [Dichanthelium oligosanthes]
146	Sobic.004G208700	124.613	3.52455	1.02132	3.45096	0.000558601	0.0542028	RLM79829.1 chitinase 6-like [Panicum miliaceum]
271	Sobic.010G158100	176.091	3.36439	0.974533	3.4523	0.000555819	0.0542028	XP_002437095.1 E3 ubiquitin-protein ligase Os06g0535400 [Sorghum bicolor]
124	Sobic.004G021900	43.0439	-9.37691	2.72312	-3.44344	0.00057436	0.0554702	CAZ96055.1 putative proteinase inhibitor I13
36	Sobic.001G351900	199.703	-3.26563	0.951614	-3.43168	0.000599855	0.0574901	XP_021307657.1 WAT1-related protein At3g45870 isoform X2 [Sorghum bicolor]
172	Sobic.005G173100	30.4496	-8.95258	2.60915	-3.43122	0.000600864	0.0574901	NA
203	Sobic.006G202700	29.5805	-7.94783	2.31845	-3.42808	0.00060786	0.0578902	XP_002448454.1 ubiquinol oxidase 1b
58	Sobic.002G128400	81.6476	-8.33367	2.4334	-3.42471	0.000615458	0.0583437	XP_002459807.1 WRKY transcription factor 6 [Sorghum bicolor]
31	Sobic.001G304900	148.007	-3.54679	1.03607	-3.42332	0.000618621	0.0583745	XP_002467530.2 uncharacterized protein LOC8058757 [Sorghum bicolor]
30	Sobic.001G301400	41.9952	9.36197	2.73748	3.41992	0.000626393	0.058838	XP_002464950.1 expansin-B2 [Sorghum bicolor]
24	Sobic.001G257200	234.376	-5.40988	1.58471	-3.4138	0.000640631	0.0599019	XP_025797133.1 uncharacterized protein LOC112877142 [Panicum hallii]
69	Sobic.002G254100	30.1689	9.13492	2.67872	3.41018	0.000649192	0.0600134	XP_002460475.2 uncharacterized protein LOC8055896 [Sorghum bicolor]
89	Sobic.003G134700	65.3818	-8.65975	2.5402	-3.40908	0.00065182	0.0600134	XP_002447950.1 lipoyl synthase
95	Sobic.003G175201	46.6495	-8.57609	2.51604	-3.40857	0.000653037	0.0600134	XP_015634909.1 probable LRR receptor-like serine/threonine-protein kinase At1g56140
112	Sobic.003G272500	486.919	-2.947	0.864941	-3.40717	0.00065641	0.0600134	NA
259	Sobic.010G054900	38.3073	-7.82189	2.29517	-3.40797	0.000654471	0.0600134	NA
255	Sobic.010G021500	786.489	3.72096	1.0941	3.40091	0.00067161	0.0611313	XP_021304227.1 protein DECREASED SIZE EXCLUSION LIMIT 1 isoform X2 [Sorghum bicolor]
140	Sobic.004G152300	286.137	3.90191	1.1482	3.39828	0.000678117	0.0614518	XP_002452133.1 PLASMODESMATA CALLOSE-BINDING PROTEIN 2 [Sorghum bicolor]
121	Sobic.004G005400	86.0532	-4.1063	1.20927	-3.39568	0.000684577	0.0617651	XP_002451361.1 DExH-box ATP-dependent RNA helicase DExH12 [Sorghum bicolor]
125	Sobic.004G033800	25.7757	-8.11686	2.39323	-3.39159	0.000694885	0.0622086	XP_002451501.2 uncharacterized protein LOC8057533 [Sorghum bicolor]
148	Sobic.004G284001	92.5181	-5.07326	1.49647	-3.39014	0.000698565	0.0622086	XP_021315152.1 uncharacterized protein LOC110434755 [Sorghum bicolor]
162	Sobic.005G086700	303.333	-3.87429	1.14255	-3.39092	0.000696589	0.0622086	XP_002449277.1 zinc-finger homeodomain protein 4 isoform X1 [Sorghum bicolor]
272	Sobic.010G158766	37.0945	7.87816	2.32502	3.38842	0.00070296	0.0623301	AAM94327.1 putative reverse transcriptase [Sorghum bicolor]
262	Sobic.010G086800	92.1888	-4.94719	1.46122	-3.38565	0.000710091	0.0626922	XP_002436721.1 blue copper protein [Sorghum bicolor]
76	Sobic.002G377800	28.3273	-7.87522	2.32695	-3.38435	0.000713473	0.0627216	XP_021308774.1 uncharacterized protein LOC8079204 [Sorghum bicolor]
260	Sobic.010G060500	2689.65	-3.57173	1.05761	-3.37718	0.000732342	0.0641064	XP_021319391.1 60S ribosomal protein L23a-like isoform X1 [Sorghum bicolor]
137	Sobic.004G144700	32.2854	7.61196	2.25585	3.37432	0.000739994	0.0642385	NA
142	Sobic.004G167300	36.9047	8.29814	2.45923	3.37428	0.000740096	0.0642385	XP_002453940.1 probable F-box protein At2g36090 [Sorghum bicolor]
183	Sobic.006G003951	27.6392	7.91942	2.34881	3.37167	0.000747135	0.0645769	NA
116	Sobic.003G336600	145.779	-3.55095	1.05598	-3.36271	0.000771802	0.0664298	XP_002456540.1 WUSCHEL-related homeobox 8 [Sorghum bicolor]
32	Sobic.001G326900	341.312	3.52396	1.04996	3.35628	0.000789983	0.0677114	XP_002465076.2 pyruvate
93	Sobic.003G159400	45.6695	-8.17081	2.4368	-3.35308	0.000799169	0.0682145	XP_008655959.1 lisH domain and HEAT repeat-containing protein KIAA1468 homolog isoform X2 [Zea mays]
45	Sobic.002G018500	26.1957	-8.34806	2.49857	-3.34113	0.000834369	0.0703434	NA
101	Sobic.003G226700	255.549	-3.73156	1.11625	-3.34294	0.000828971	0.0703434	XP_002455982.1 kinesin-like protein KIN-13B [Sorghum bicolor]
257	Sobic.010G043900	42.7273	-8.97037	2.68482	-3.34115	0.000834327	0.0703434	NA
55	Sobic.002G075700	392.337	-2.86738	0.858596	-3.33961	0.000838953	0.0704413	XP_002461676.2 probable LRR receptor-like serine/threonine-protein kinase At3g47570 [Sorghum bicolor]
42	Sobic.001G541166	136.801	5.40394	1.61927	3.33727	0.00084606	0.0707492	XP_002468689.2 scarecrow-like protein 6 [Sorghum bicolor]
29	Sobic.001G285600	34.7447	8.38605	2.51461	3.33493	0.000853221	0.0710591	XP_008649117.1 uncharacterized protein LOC103629788 isoform X1 [Zea mays]
179	Sobic.005G220620	41.0161	-8.99549	2.705	-3.32551	0.000882578	0.0732077	XP_021306013.1 uncharacterized protein LOC110431324 isoform X2 [Sorghum bicolor]
87	Sobic.003G097300	32.7867	-8.94723	2.69463	-3.32039	0.000898918	0.0739666	OEL28684.1 hypothetical protein [Dichanthelium oligosanthes]
167	Sobic.005G110800	1145.35	-2.71553	0.817619	-3.32126	0.000896113	0.0739666	XP_002449445.1 wound-induced basic protein [Sorghum bicolor]
13	Sobic.001G149901	28.1609	-8.83978	2.66444	-3.31769	0.000907666	0.074121	NA
35	Sobic.001G334400	34.8418	6.92158	2.08633	3.31758	0.000908002	0.074121	XP_021308267.1 U-box domain-containing protein 57 [Sorghum bicolor]
130	Sobic.004G111000	328.637	-3.73047	1.12613	-3.31266	0.000924129	0.0751394	XP_021314622.1 transcription factor GTE4 isoform X1 [Sorghum bicolor]
129	Sobic.004G107200	760.319	2.77121	0.840501	3.29709	0.000976924	0.0791193	XP_002453597.1 ubiquitin carboxyl-terminal hydrolase 15 [Sorghum bicolor]
191	Sobic.006G066600	3548.32	-3.13322	0.951009	-3.29463	0.000985524	0.0791923	NA
236	Sobic.008G185200	26.2779	8.10162	2.45879	3.29496	0.000984351	0.0791923	XP_002442596.1 putative disease resistance RPP13-like protein 3 [Sorghum bicolor]
65	Sobic.002G192900	204.85	3.85897	1.1738	3.28759	0.00101049	0.0805822	XP_021310280.1 AUGMIN subunit 5 isoform X3 [Sorghum bicolor]
198	Sobic.006G144500	218.925	4.52122	1.37538	3.28725	0.00101172	0.0805822	NA
248	Sobic.009G101600	162.652	3.49993	1.06496	3.28645	0.00101457	0.0805822	XP_021303426.1 uncharacterized protein LOC8061322 [Sorghum bicolor]
22	Sobic.001G227850	74.9568	-5.87884	1.7937	-3.27749	0.00104736	0.082234	NA
39	Sobic.001G397800	26.3801	-7.84764	2.39398	-3.27807	0.00104521	0.082234	XP_021306779.1 BRCT domain-containing protein At4g02110 isoform X4 [Sorghum bicolor]
217	Sobic.007G083300	28.8308	8.12405	2.47794	3.27855	0.00104341	0.082234	XP_021321435.1 paired amphipathic helix protein Sin3-like 6 [Sorghum bicolor]
81	Sobic.003G077700	216.799	3.0596	0.934233	3.27498	0.00105669	0.082651	XP_021312870.1 protein root UVB sensitive 5 [Sorghum bicolor]
107	Sobic.003G256550	50.4674	-6.5542	2.00447	-3.26979	0.00107629	0.0838647	NA
250	Sobic.009G206800	28.5613	-8.04069	2.46087	-3.26742	0.00108533	0.0842504	XP_002441423.1 probable WRKY transcription factor 56 [Sorghum bicolor]
261	Sobic.010G060600	208.954	3.12209	0.955925	3.26604	0.00109062	0.0843425	XP_004951662.1 pyrophosphate-energized vacuolar membrane proton pump isoform X2 [Setaria italica]
149	Sobic.004G289000	32.9241	9.08692	2.78536	3.26238	0.00110479	0.0851187	XP_021315364.1 U-box domain-containing protein 33 [Sorghum bicolor]
51	Sobic.002G061732	119.545	6.35894	1.95302	3.25595	0.00113013	0.0867463	XP_021320559.1 uncharacterized protein LOC110436977 isoform X1 [Sorghum bicolor]
244	Sobic.009G021300	76.5124	5.73014	1.76368	3.24896	0.00115826	0.0885745	XP_002439180.1 uncharacterized protein LOC8067357 [Sorghum bicolor]
134	Sobic.004G117200	21.3483	-8.14193	2.50936	-3.24463	0.00117605	0.0896019	XP_002453640.1 plastid division protein PDV1 [Sorghum bicolor]
155	Sobic.004G351200	1233.65	-3.73114	1.15105	-3.2415	0.00118902	0.0902558	XP_002453072.1 aquaporin PIP1-5 [Sorghum bicolor]
275	Sobic.010G208600	46.1822	-8.75982	2.70971	-3.23275	0.00122605	0.0927246	XP_014755945.1 uncharacterized protein LOC100824808 [Brachypodium distachyon]
205	Sobic.006G218600	123.351	4.02953	1.24815	3.22839	0.00124487	0.0938031	XP_021318473.1 F-box/kelch-repeat protein At5g60570 isoform X2 [Sorghum bicolor]
82	Sobic.003G079750	29.446	-7.67956	2.3882	-3.21562	0.00130162	0.0974023	XP_004968137.1 LEAF RUST 10 DISEASE-RESISTANCE LOCUS RECEPTOR-LIKE PROTEIN KINASE-like 2.4 [Setaria italica]
122	Sobic.004G012000	110.208	-5.03555	1.56602	-3.21551	0.00130211	0.0974023	XP_021314883.1 transcription factor ILR3-like isoform X2 [Sorghum bicolor]
249	Sobic.009G149000	37.6214	8.88312	2.76668	3.21075	0.00132391	0.0986742	XP_020395166.2 protein NRT1/ PTR FAMILY 5.10 [Zea mays]
68	Sobic.002G242300	52.4848	-6.79887	2.11891	-3.20867	0.0013335	0.0990304	XP_002462549.1 caffeoyl-CoA O-methyltransferase 6 [Sorghum bicolor]
33	Sobic.001G329800	126.953	-4.08694	1.27467	-3.20627	0.00134466	0.0994998	XP_002465087.1 allene oxide cyclase
