# Supplementary material for: Drought-Induced Root Pressure in Sorghum bicolor
Source: Front Plant Sci. 2021 Feb 3;12:571072. doi: 10.3389/fpls.2021.571072 (PMC7886691; doi:10.3389/fpls.2021.571072)
Supplement: Supplementary file 3 [file Table_3.xls]

## Sheet: def_mid_vs_def_lo_annot_long.cs
Supplementary Table 3. Transcripts with significant differential expression between the Deficit watering, Mid-range root pressure group and the Deficit watering, Low root pressure group. Sequences were BLASTed against a database of known Poaceae genes and identified under the column "poaceae_function".
ID	gene	baseMean	log2FoldChange	lfcSE	stat	pvalue	padj	poaceae_function
42	Sobic.001G195600	9146.16	10.7696	1.19394	9.02022	1.88e-19	4.07e-15	NA
636	Sobic.010G036301	1925.94	-14.5035	1.70014	-8.53076	1.45e-17	1.58e-13	XP_021304712.1 uncharacterized protein LOC8068777 [Sorghum bicolor]
261	Sobic.003G228000	928.137	8.87925	1.08957	8.14935	3.66e-16	2.28e-12	XP_002458199.1 cytochrome P450 72A15 isoform X1 [Sorghum bicolor]
643	Sobic.010G085400	580.019	7.17251	0.881958	8.13248	4.21e-16	2.28e-12	XP_002436710.1 MADS-box transcription factor 55 [Sorghum bicolor]
79	Sobic.001G335800	592.629	-9.0993	1.13986	-7.98281	1.43e-15	6.2e-12	NA
406	Sobic.005G126100	66.566	-20.8114	2.63101	-7.91004	2.57e-15	9.3e-12	XP_002450798.1 leucine-rich repeat protein 1 [Sorghum bicolor]
239	Sobic.003G166875	539.237	13.0605	1.68624	7.7453	9.54e-15	2.61e-11	XP_021313435.1 uncharacterized protein LOC8069552 isoform X1 [Sorghum bicolor]
378	Sobic.005G003500	727.293	13.5287	1.74692	7.74431	9.61e-15	2.61e-11	XP_021316425.1 uncharacterized protein LOC110435305 isoform X1 [Sorghum bicolor]
17	Sobic.001G064200	1355.9	13.2225	1.73023	7.64207	2.14e-14	5.15e-11	XP_002436560.1 mitochondrial outer membrane import complex protein METAXIN isoform X1 [Sorghum bicolor]
344	Sobic.004G152601	425.278	-12.4132	1.70497	-7.28059	3.32e-13	7.21e-10	XP_021315702.1 uncharacterized protein LOC110434949 [Sorghum bicolor]
508	Sobic.007G072133	451.028	9.32956	1.29719	7.19215	6.38e-13	1.26e-09	XP_021320385.1 zinc finger BED domain-containing protein RICESLEEPER 2-like isoform X2 [Sorghum bicolor]
62	Sobic.001G262400	437.331	-7.97258	1.12643	-7.07776	1.47e-12	2.65e-09	XP_002444393.2 uncharacterized protein LOC8077820 [Sorghum bicolor]
655	Sobic.010G136400	342.435	-12.5256	1.78726	-7.00828	2.41e-12	4.03e-09	NA
187	Sobic.002G322200	322.321	12.356	1.7735	6.96702	3.24e-12	5.02e-09	NA
121	Sobic.002G035900	457.051	-11.5537	1.68979	-6.83737	8.07e-12	1.12e-08	OEL28426.1 Peroxisomal membrane protein 13 [Dichanthelium oligosanthes]	Involved in PTS1- and PTS2-dependent protein import into peroxisomes (PubMed:16813573, PubMed:17478547). Required for PTS1-dependent protein import into pollen peroxisomes (PubMed:18160292). Acts as a docking factor on peroxisomal membranes (PubMed:16813573). Required for the proper targeting of PEX7 to the peroxisome (PubMed:19594707). Required for the export/release of receptors on the peroxiso…
138	Sobic.002G080450	307.438	-11.8135	1.72954	-6.83045	8.46e-12	1.12e-08	XP_021309589.1 uncharacterized protein LOC110432865 isoform X2 [Sorghum bicolor]
247	Sobic.003G191350	344.586	-11.9266	1.74956	-6.81691	9.3e-12	1.12e-08	XP_022682433.1 protein FAR1-RELATED SEQUENCE 3-like [Setaria italica]
522	Sobic.007G194500	297.373	-11.6958	1.71444	-6.82194	8.98e-12	1.12e-08	PWZ27044.1 hypothetical protein [Zea mays]
125	Sobic.002G046900	621.007	-6.29503	0.930305	-6.76663	1.32e-11	1.5e-08	XP_002459392.1 uncharacterized protein LOC8081174 [Sorghum bicolor]
268	Sobic.003G256600	322.285	11.4007	1.70719	6.67802	2.42e-11	2.58e-08	BAJ89970.1 predicted protein [Hordeum vulgare subsp. vulgare]
528	Sobic.007G213925	311.746	-12.1222	1.81654	-6.67322	2.5e-11	2.58e-08	XP_021319834.1 uncharacterized protein LOC110436685 isoform X1 [Sorghum bicolor]
679	Sobic.010G232400	317.434	7.46169	1.13496	6.57439	4.89e-11	4.82e-08	AVY91808.1 trehalose-phosphatase [Saccharum hybrid cultivar SP80-3280]
593	Sobic.008G183700	352.388	8.79237	1.34204	6.5515	5.7e-11	5.37e-08	XP_025808500.1 CBBY-like protein [Panicum hallii]
123	Sobic.002G037900	288.2	-6.35888	0.979141	-6.49434	8.34e-11	7.54e-08	XP_002461478.1 uncharacterized protein LOC8086421 [Sorghum bicolor]
369	Sobic.004G324600	362.067	10.2573	1.59815	6.41822	1.38e-10	1.19e-07	NA
390	Sobic.005G055900	442.251	8.00986	1.24911	6.41246	1.43e-10	1.19e-07	XP_015615692.1 putative receptor-like protein kinase At3g47110 isoform X1 [Oryza sativa Japonica Group]
616	Sobic.009G101600	162.652	-11.3321	1.78659	-6.34284	2.26e-10	1.81e-07	XP_021303426.1 uncharacterized protein LOC8061322 [Sorghum bicolor]
595	Sobic.009G004700	329.881	8.20569	1.30781	6.27437	3.51e-10	2.72e-07	XP_002439107.2 putative disease resistance RPP13-like protein 2 [Sorghum bicolor]
179	Sobic.002G286300	175.955	11.4827	1.85319	6.19619	5.78e-10	4.25e-07	CDM81595.1 unnamed protein product [Triticum aestivum]
260	Sobic.003G217566	330.261	11.7644	1.89939	6.19378	5.87e-10	4.25e-07	XP_002458146.1 thrombospondin type-1 domain-containing protein 4 [Sorghum bicolor]
496	Sobic.007G005000	354.343	-11.4697	1.85792	-6.17338	6.68e-10	4.68e-07	XP_002456195.1 uncharacterized protein LOC8063106 isoform X1 [Sorghum bicolor]
407	Sobic.005G126701	222.641	10.761	1.74615	6.16268	7.15e-10	4.85e-07	SPT19093.1 unnamed protein product [Triticum aestivum]
294	Sobic.003G406240	256.323	-10.7333	1.76097	-6.09513	1.09e-09	7.11e-07	XP_021311075.1 uncharacterized protein LOC110433393 isoform X1 [Sorghum bicolor]
512	Sobic.007G080780	247.691	-11.41	1.8729	-6.09218	1.11e-09	7.11e-07	XP_014756414.1 receptor-like protein EIX2 [Brachypodium distachyon]
477	Sobic.006G188400	65.1572	-17.7362	2.93067	-6.05193	1.43e-09	8.87e-07	XP_021319505.1 uncharacterized protein LOC110436549 [Sorghum bicolor]
668	Sobic.010G176550	190.799	-10.6922	1.78149	-6.00185	1.95e-09	1.18e-06	XP_021302010.1 uncharacterized protein LOC110429779 [Sorghum bicolor]
153	Sobic.002G136600	427.28	-11.8082	1.9771	-5.97249	2.34e-09	1.37e-06	NA
248	Sobic.003G193000	129.059	-11.0009	1.84336	-5.96784	2.4e-09	1.37e-06	XP_002458027.1 leucine-rich repeat receptor protein kinase EMS1 [Sorghum bicolor]
535	Sobic.008G007300	203.26	-11.0997	1.86274	-5.95879	2.54e-09	1.41e-06	NP_001346311.1 uncharacterized protein LOC100194045 [Zea mays]
654	Sobic.010G135250	198.864	-10.3277	1.75034	-5.90042	3.63e-09	1.97e-06	RLN04497.1 BTB/POZ and TAZ domain-containing protein 3 [Panicum miliaceum]
129	Sobic.002G055700	1808.09	5.09479	0.867224	5.87483	4.23e-09	2.19e-06	XP_002459438.1 xylanase inhibitor protein 1 [Sorghum bicolor]
364	Sobic.004G289500	1171.84	-27.5376	4.68561	-5.87706	4.18e-09	2.19e-06	XP_021303583.1 uncharacterized protein LOC110430338 isoform X1 [Sorghum bicolor]
113	Sobic.002G003200	164.045	-10.8453	1.85044	-5.86091	4.6e-09	2.32e-06	XP_002459202.1 peroxidase 1 [Sorghum bicolor]
293	Sobic.003G406180	240.907	-11.501	1.96564	-5.85101	4.89e-09	2.41e-06	NA
500	Sobic.007G010200	222.825	-11.1607	1.9304	-5.78154	7.4e-09	3.57e-06	XP_021320247.1 uncharacterized protein LOC8068539 [Sorghum bicolor]
142	Sobic.002G097000	334.166	-11.9386	2.06839	-5.77191	7.84e-09	3.7e-06	XP_002459648.2 uncharacterized protein LOC8054443 [Sorghum bicolor]
570	Sobic.008G106800	194.116	-10.8593	1.88841	-5.75053	8.9e-09	4.11e-06	XP_021301851.1 isoflavone reductase homolog isoform X2 [Sorghum bicolor]
507	Sobic.007G055900	157.016	-10.0817	1.75861	-5.73277	9.88e-09	4.46e-06	XP_021320357.1 7-deoxyloganetin glucosyltransferase [Sorghum bicolor]
657	Sobic.010G140525	205.546	11.1637	1.95355	5.71459	1.1e-08	4.87e-06	XP_021305274.1 uncharacterized protein LOC110431046 isoform X2 [Sorghum bicolor]
381	Sobic.005G013400	146.324	-10.4897	1.8446	-5.68672	1.3e-08	5.62e-06	XP_021316320.1 probable WRKY transcription factor 53 [Sorghum bicolor]
152	Sobic.002G128600	215.378	-10.3061	1.81753	-5.67037	1.42e-08	6.06e-06	XP_002459808.1 lecithin-cholesterol acyltransferase-like 1 [Sorghum bicolor]
328	Sobic.004G101601	970.338	27.0534	4.78487	5.65394	1.57e-08	6.54e-06	NA
350	Sobic.004G190100	105.837	-10.4029	1.85249	-5.61565	1.96e-08	8.01e-06	XP_002452331.1 hornerin [Sorghum bicolor]
571	Sobic.008G109100	146.965	-9.78129	1.76399	-5.54499	2.94e-08	1.18e-05	XP_021301291.1 uncharacterized protein LOC8064588 isoform X1 [Sorghum bicolor]
311	Sobic.004G007400	117.854	-10.5718	1.91396	-5.52351	3.32e-08	1.31e-05	XP_021314480.1 zinc finger protein CONSTANS-LIKE 15 [Sorghum bicolor]
59	Sobic.001G253800	102.498	-10.2143	1.87041	-5.46099	4.73e-08	1.83e-05	XP_021312282.1 uncharacterized protein LOC110433832 isoform X2 [Sorghum bicolor]
14	Sobic.001G053200	333.865	25.4138	4.66302	5.45007	5.04e-08	1.92e-05	XP_021302058.1 uncharacterized protein LOC110429789 [Sorghum bicolor]
265	Sobic.003G251100	192.963	9.87334	1.81325	5.44511	5.18e-08	1.94e-05	XP_021315048.1 uncharacterized protein LOC110434701 [Sorghum bicolor]
38	Sobic.001G169000	498.586	25.9675	4.78493	5.42694	5.73e-08	2.07e-05	NA
490	Sobic.006G235650	560.321	10.0022	1.84272	5.42796	5.7e-08	2.07e-05	XP_021319334.1 protein FAR1-RELATED SEQUENCE 5 [Sorghum bicolor]
395	Sobic.005G075500	353.865	25.3485	4.68581	5.40963	6.32e-08	2.25e-05	XP_021316454.1 uncharacterized protein LOC110435329 isoform X1 [Sorghum bicolor]
672	Sobic.010G182100	663.047	4.14193	0.766845	5.40127	6.62e-08	2.31e-05	XP_021304811.1 elongation factor 1-alpha [Sorghum bicolor]
660	Sobic.010G151200	290.672	25.0594	4.67649	5.35859	8.39e-08	2.89e-05	XP_021305874.1 uncharacterized protein LOC110431275 isoform X1 [Sorghum bicolor]
202	Sobic.002G393800	99.7663	-23.3025	4.38743	-5.3112	1.09e-07	3.69e-05	XP_002463270.1 disease resistance protein RPM1 [Sorghum bicolor]
335	Sobic.004G112600	421.765	25.1916	4.75903	5.29344	1.2e-07	3.94e-05	XP_002453625.1 uncharacterized protein LOC8078341 [Sorghum bicolor]
385	Sobic.005G019500	133.658	-24.0773	4.54781	-5.29426	1.2e-07	3.94e-05	XP_002448248.2 uncharacterized protein LOC8055924 isoform X2 [Sorghum bicolor]
446	Sobic.006G077700	156.303	-11.3684	2.15839	-5.26705	1.39e-07	4.49e-05	XP_021316058.1 uncharacterized protein LOC110435063 [Sorghum bicolor]
198	Sobic.002G351400	287.689	-10.3828	1.97392	-5.25998	1.44e-07	4.6e-05	XP_002463077.1 alpha-amylase/trypsin inhibitor [Sorghum bicolor]
463	Sobic.006G148800	526.721	5.527	1.05294	5.2491	1.53e-07	4.67e-05	XP_002448193.1 phenylalanine ammonia-lyase [Sorghum bicolor]
541	Sobic.008G014601	110.787	10.8012	2.05636	5.2526	1.5e-07	4.67e-05	RLN00791.1 hypothetical protein [Panicum miliaceum]
674	Sobic.010G205700	95.9384	-10.0114	1.90661	-5.2509	1.51e-07	4.67e-05	XP_021304897.1 uncharacterized protein LOC8067711 isoform X2 [Sorghum bicolor]
16	Sobic.001G056900	190.766	24.4001	4.65882	5.23739	1.63e-07	4.91e-05	NA
164	Sobic.002G195900	139.44	-9.70719	1.85696	-5.22746	1.72e-07	5.11e-05	XP_002460188.1 uncharacterized protein LOC8056237 [Sorghum bicolor]
646	Sobic.010G106200	668.997	-4.29926	0.822839	-5.22491	1.74e-07	5.11e-05	XP_002438183.1 signal recognition particle 9 kDa protein [Sorghum bicolor]
422	Sobic.005G192300	87.312	-9.88697	1.90709	-5.18431	2.17e-07	6.19e-05	XP_021317377.1 putative disease resistance RPP13-like protein 3 isoform X1 [Sorghum bicolor]
448	Sobic.006G088580	1280.71	7.96222	1.53536	5.18591	2.15e-07	6.19e-05	NA
599	Sobic.009G006400	134.694	10.6806	2.06408	5.17454	2.28e-07	6.44e-05	XP_021302594.1 WAT1-related protein At5g64700 isoform X2 [Sorghum bicolor]	transmembrane transporter activity
401	Sobic.005G110451	85.3679	-10.5241	2.03668	-5.16727	2.38e-07	6.61e-05	XP_002489328.2 flavonoid O-methyltransferase-like protein Os11g0303600 [Sorghum bicolor]
161	Sobic.002G185300	430.102	-5.47422	1.06125	-5.1583	2.49e-07	6.79e-05	XP_021307895.1 uncharacterized protein LOC8056178 isoform X2 [Sorghum bicolor]
307	Sobic.003G444300	90.5118	-9.73056	1.88675	-5.15732	2.51e-07	6.79e-05	XP_002443394.2 uncharacterized protein LOC8068106 [Sorghum bicolor]
304	Sobic.003G430400	93.7966	-10.4096	2.02328	-5.1449	2.68e-07	7.17e-05	XP_002459117.1 probable calcium-binding protein CML31 [Sorghum bicolor]
285	Sobic.003G335601	236.076	24.1905	4.72245	5.12244	3.02e-07	7.98e-05	XP_021311999.1 uncharacterized protein LOC110433755 [Sorghum bicolor]
41	Sobic.001G195500	120.34	9.64488	1.89204	5.0976	3.44e-07	8.99e-05	NA
37	Sobic.001G156000	619.934	-6.71431	1.32175	-5.07988	3.78e-07	9.65e-05	XP_002464173.1 probable glutathione S-transferase parA [Sorghum bicolor]
483	Sobic.006G208300	83.2086	-9.92877	1.9546	-5.0797	3.78e-07	9.65e-05	XP_002447062.1 uncharacterized protein LOC8072311 [Sorghum bicolor]
513	Sobic.007G090454	150.776	-23.4908	4.64311	-5.05928	4.21e-07	0.000106135	NA
408	Sobic.005G129501	272.67	5.03925	0.997378	5.0525	4.36e-07	0.000108712	XP_015624478.1 protein ACTIVITY OF BC1 COMPLEX KINASE 8
536	Sobic.008G007800	76.912	-9.86302	1.95303	-5.05012	4.42e-07	0.000108822	XP_021302189.1 uncharacterized protein LOC110429838 isoform X2 [Sorghum bicolor]
100	Sobic.001G417100	72.5766	-9.96821	1.97567	-5.04548	4.52e-07	0.000110245	NA
213	Sobic.003G066300	74.9882	-9.73424	1.93703	-5.02535	5.03e-07	0.000119772	NA
281	Sobic.003G290050	77.7807	-10.3895	2.06663	-5.02727	4.98e-07	0.000119772	NA
391	Sobic.005G057500	69.7764	-10.1494	2.02068	-5.02278	5.09e-07	0.000120067	XP_002450391.1 uncharacterized protein LOC8073656 [Sorghum bicolor]
182	Sobic.002G305750	130.619	10.0849	2.0188	4.99548	5.87e-07	0.00013687	NA
36	Sobic.001G149201	145.049	10.0533	2.01756	4.98287	6.26e-07	0.000141536	XP_002466729.1 tankyrase [Sorghum bicolor]
210	Sobic.003G051400	81.705	-9.75588	1.95723	-4.98454	6.21e-07	0.000141536	XP_002457267.1 putative cytochrome c oxidase subunit 5C-4 [Sorghum bicolor]
604	Sobic.009G018100	116.844	10.2941	2.06426	4.98683	6.14e-07	0.000141536	NA
485	Sobic.006G218600	123.351	-6.73431	1.35445	-4.97199	6.63e-07	0.000148173	XP_021318473.1 F-box/kelch-repeat protein At5g60570 isoform X2 [Sorghum bicolor]
61	Sobic.001G262000	74.0536	-9.87495	1.98742	-4.96873	6.74e-07	0.00014915	XP_008663383.1 uncharacterized protein LOC103164614 [Zea mays]
186	Sobic.002G321800	106.782	-9.3641	1.88655	-4.9636	6.92e-07	0.0001516	XP_002460794.2 60S ribosomal protein L36a
569	Sobic.008G104601	426.916	8.86862	1.78804	4.95995	7.05e-07	0.00015293	NA
237	Sobic.003G151100	470.409	4.91624	0.995623	4.93785	7.9e-07	0.000169621	NA
101	Sobic.001G425600	137.965	-11.1184	2.25929	-4.92119	8.6e-07	0.00018291	XP_021303021.1 17.9 kDa class I heat shock protein [Sorghum bicolor]
542	Sobic.008G017500	60.9785	-9.80849	1.99546	-4.9154	8.86e-07	0.000186568	XP_020179292.1 zinc finger MYM-type protein 1-like [Aegilops tauschii subsp. tauschii]
126	Sobic.002G048001	157.043	-10.7051	2.19064	-4.88675	1.03e-06	0.00021282	AAT01370.1 putative non-LTR retroelement reverse transcriptase [Oryza sativa Japonica Group]
409	Sobic.005G129600	224.095	7.69207	1.57439	4.88576	1.03e-06	0.00021282	XP_021316645.1 serine carboxypeptidase-like 45 [Sorghum bicolor]
289	Sobic.003G368800	757.179	-3.95944	0.811029	-4.88199	1.05e-06	0.000214881	XP_021310801.1 uncharacterized protein LOC110433303 isoform X1 [Sorghum bicolor]
49	Sobic.001G217700	389.887	4.70295	0.963786	4.87966	1.06e-06	0.000215404	NA
330	Sobic.004G107700	90.7545	-8.88404	1.83032	-4.85382	1.21e-06	0.000243208	XP_002451857.2 uncharacterized protein LOC8078315 [Sorghum bicolor]
231	Sobic.003G131100	209.172	7.82017	1.62424	4.81468	1.47e-06	0.000293374	XP_002455459.1 cyclic dof factor 2 [Sorghum bicolor]
141	Sobic.002G089700	126.452	8.3693	1.74493	4.79635	1.62e-06	0.000318603	XP_002461750.1 cytochrome P450 76M5 [Sorghum bicolor]
246	Sobic.003G191200	60.6284	-9.62569	2.00924	-4.79071	1.66e-06	0.00032378	XP_021310748.1 uncharacterized protein LOC110433279 [Sorghum bicolor]
649	Sobic.010G117900	84.5922	10.1332	2.11572	4.7895	1.67e-06	0.00032378	XP_002436875.1 probable aldo-keto reductase 3 [Sorghum bicolor]
197	Sobic.002G351200	718.595	-4.46712	0.93423	-4.7816	1.74e-06	0.000333787	XP_002460909.1 uncharacterized protein LOC8058348 [Sorghum bicolor]
503	Sobic.007G032100	140.803	-8.68582	1.82282	-4.76504	1.89e-06	0.00035859	AAL73523.1 OCL5 protein [Sorghum bicolor]
515	Sobic.007G110600	58.5089	-9.51815	1.99808	-4.76364	1.9e-06	0.00035859	NA
3	Sobic.001G019601	91.9642	10.5363	2.21888	4.74846	2.05e-06	0.000383247	XP_021303488.1 PRA1 family protein B2-like [Sorghum bicolor]
373	Sobic.004G348500	107.149	9.96041	2.09963	4.74388	2.1e-06	0.000388668	XP_002454793.1 protein KINESIN LIGHT CHAIN-RELATED 2 [Sorghum bicolor]
315	Sobic.004G029450	61.1282	-9.68586	2.04375	-4.73926	2.14e-06	0.000394256	XP_002453253.1 uncharacterized protein LOC8069922 [Sorghum bicolor]
567	Sobic.008G089600	60.0855	9.88911	2.09397	4.72265	2.33e-06	0.00042428	AAL75486.1 putative Fourf gag/pol protein [Zea mays]
524	Sobic.007G198800	61.3834	-9.60438	2.03618	-4.71686	2.4e-06	0.0004329	XP_002444726.1 BTB/POZ and MATH domain-containing protein 1 [Sorghum bicolor]
21	Sobic.001G077800	118.753	-10.8411	2.3006	-4.71231	2.45e-06	0.000439014	XP_002466395.1 probable transcription factor GLK2 [Sorghum bicolor]
60	Sobic.001G261577	315.935	-6.26744	1.33183	-4.7059	2.53e-06	0.00044934	XP_021305470.1 uncharacterized protein LOC110431098 [Sorghum bicolor]
532	Sobic.007G222200	60.0928	-9.67216	2.05742	-4.70111	2.59e-06	0.000456257	NA
502	Sobic.007G020500	1150.76	-3.51872	0.749506	-4.69472	2.67e-06	0.00046696	XP_021320644.1 transcription factor TFIIIB component B'' [Sorghum bicolor]
52	Sobic.001G228600	83.5395	9.57876	2.04613	4.6814	2.85e-06	0.00049438	NA
530	Sobic.007G215600	317.519	6.46478	1.38446	4.66954	3.02e-06	0.000519627	XP_021321421.1 wall-associated receptor kinase 2 [Sorghum bicolor]
656	Sobic.010G137100	208.492	-4.56202	0.979361	-4.65816	3.19e-06	0.000544877	XP_002450102.1 ubiquitin-activating enzyme E1 1 [Sorghum bicolor]
156	Sobic.002G164960	125.732	10.4294	2.24591	4.64373	3.42e-06	0.000579787	NA
605	Sobic.009G021300	76.5124	-10.3406	2.23005	-4.63691	3.54e-06	0.000594602	XP_002439180.1 uncharacterized protein LOC8067357 [Sorghum bicolor]
275	Sobic.003G264901	63.6627	-9.18079	1.98175	-4.63266	3.61e-06	0.000602292	XP_002458351.2 uncharacterized protein LOC8063097 [Sorghum bicolor]
31	Sobic.001G101200	77.6434	10.1924	2.20663	4.61898	3.86e-06	0.000638479	XP_002466510.1 uncharacterized protein LOC8059942 [Sorghum bicolor]
585	Sobic.008G159500	234.971	4.10842	0.894054	4.59526	4.32e-06	0.00071015	NA
482	Sobic.006G202800	76.0633	9.39358	2.04807	4.58654	4.51e-06	0.000734896	NA
284	Sobic.003G335501	106.99	9.73114	2.12389	4.58176	4.61e-06	0.00074629	XP_021301586.1 uncharacterized protein LOC8068817 isoform X1 [Sorghum bicolor]
436	Sobic.006G008300	256.131	-5.72167	1.25457	-4.56065	5.1e-06	0.000819293	XP_002446041.2 SWI/SNF complex subunit SWI3D [Sorghum bicolor]
534	Sobic.008G006800	59.3696	-9.35027	2.05236	-4.55586	5.22e-06	0.000832023	XP_002441683.1 probable leucine-rich repeat receptor-like protein kinase IMK3 [Sorghum bicolor]
221	Sobic.003G092033	86.4263	-9.64208	2.11811	-4.55221	5.31e-06	0.000840406	AAQ56556.1 hypothetical protein [Oryza sativa Japonica Group]
367	Sobic.004G324300	59.6104	9.92177	2.18313	4.54474	5.5e-06	0.000864453	XP_002452951.1 uncharacterized protein LOC8082715 [Sorghum bicolor]
413	Sobic.005G159200	185.397	-6.30507	1.39131	-4.53174	5.85e-06	0.000912823	NA
271	Sobic.003G257800	57.3647	-9.95017	2.19754	-4.52787	5.96e-06	0.000923028	NA
2	Sobic.001G015000	263.1	-5.03106	1.11168	-4.52564	6.02e-06	0.000926194	XP_002463529.1 keratin
262	Sobic.003G228200	57.8493	-9.39948	2.08016	-4.51863	6.22e-06	0.000950674	XP_002458201.1 cytochrome P450 72A15 [Sorghum bicolor]
460	Sobic.006G137000	369.064	-4.4116	0.976892	-4.51596	6.3e-06	0.000956007	XP_021318459.1 probable protein phosphatase 2C 42 isoform X1 [Sorghum bicolor]
112	Sobic.002G002300	99.4403	-8.03034	1.78228	-4.50566	6.62e-06	0.00099658	NA
82	Sobic.001G338900	73.8517	-7.99563	1.77552	-4.50326	6.69e-06	0.00100098	XP_002465136.1 9-beta-pimara-7
45	Sobic.001G206600	66.6925	-10.1273	2.24991	-4.50122	6.76e-06	0.00100267	XP_002467012.2 pH-response regulator protein palA/RIM20 [Sorghum bicolor]
74	Sobic.001G307300	72.3759	-8.96296	1.99199	-4.4995	6.81e-06	0.00100267	PWZ54716.1 Short-chain dehydrogenase TIC 32
218	Sobic.003G081000	153.927	6.90569	1.53607	4.49569	6.93e-06	0.00100267	XP_021315150.1 uncharacterized protein LOC110434754 [Sorghum bicolor]
220	Sobic.003G089100	4520.11	-5.73445	1.27486	-4.49812	6.86e-06	0.00100267	PWZ23431.1 Actin-interacting protein 1-2 [Zea mays]
454	Sobic.006G118700	75.4662	7.26233	1.61492	4.49703	6.89e-06	0.00100267	AAU10819.1 putative polyprotein [Oryza sativa Japonica Group]
519	Sobic.007G141380	5192.01	-5.6584	1.26049	-4.48904	7.15e-06	0.00102762	XP_021321374.1 protein FAR1-RELATED SEQUENCE 5-like [Sorghum bicolor]
158	Sobic.002G177900	88.9754	7.09597	1.58412	4.47945	7.48e-06	0.00106785	XP_002460093.2 uncharacterized protein LOC8054603 [Sorghum bicolor]
66	Sobic.001G279000	179.688	8.70768	1.9471	4.47214	7.74e-06	0.0010978	XP_021319325.1 uncharacterized protein LOC8086263 [Sorghum bicolor]
432	Sobic.005G221425	66.8792	-8.76968	1.96175	-4.47035	7.81e-06	0.00109984	NA
298	Sobic.003G417100	83.8313	-8.72567	1.95492	-4.46344	8.07e-06	0.00112135	XP_002459048.2 probable esterase PIR7A [Sorghum bicolor]
596	Sobic.009G004800	89.8477	7.29534	1.63446	4.46345	8.06e-06	0.00112135	XP_015615725.1 unnamed protein product [Oryza sativa Japonica Group]
583	Sobic.008G155800	63.3861	8.89538	1.99384	4.46143	8.14e-06	0.00112472	XP_021302361.1 kinase D-interacting substrate of 220 kDa-like [Sorghum bicolor]
283	Sobic.003G331700	115.52	-8.6755	1.95118	-4.44627	8.74e-06	0.00119938	XP_002456520.1 pathogenesis-related protein [Sorghum bicolor]
375	Sobic.004G352301	85.1777	-9.02017	2.02935	-4.44486	8.79e-06	0.00119969	XP_021314381.1 remorin isoform X7 [Sorghum bicolor]
48	Sobic.001G213400	1586.02	-3.53272	0.795128	-4.44296	8.87e-06	0.0012028	NA
368	Sobic.004G324350	68.0573	9.96433	2.24583	4.43681	9.13e-06	0.00122995	XP_021317698.1 photosystem I chlorophyll a/b-binding protein 6
557	Sobic.008G063300	1824.86	-3.11749	0.707256	-4.40787	1.04e-05	0.00139762	XP_021302160.1 small RNA degrading nuclease 5 isoform X1 [Sorghum bicolor]
341	Sobic.004G127300	53.2247	-9.84278	2.24549	-4.38335	1.17e-05	0.00155503	XP_021314523.1 uncharacterized protein LOC110434571 isoform X5 [Sorghum bicolor]
550	Sobic.008G040600	92.9609	8.98299	2.05128	4.37921	1.19e-05	0.0015752	XP_002441853.1 G-box-binding factor 3 [Sorghum bicolor]
135	Sobic.002G075700	392.337	3.75188	0.858114	4.37224	1.23e-05	0.00161651	XP_002461676.2 probable LRR receptor-like serine/threonine-protein kinase At3g47570 [Sorghum bicolor]
635	Sobic.010G028501	466.176	-4.14633	0.948857	-4.36981	1.24e-05	0.00162474	XP_021305809.1 G-type lectin S-receptor-like serine/threonine-protein kinase At1g11410 [Sorghum bicolor]
181	Sobic.002G291000	58.0538	-9.61151	2.20189	-4.36511	1.27e-05	0.00165014	NA
442	Sobic.006G018400	722.69	-5.23118	1.20098	-4.35576	1.33e-05	0.00171194	XP_021318307.1 probable protein phosphatase 2C 37 [Sorghum bicolor]
424	Sobic.005G208100	549.975	-6.54994	1.50617	-4.34872	1.37e-05	0.00175734	XP_021317478.1 protein NSP-INTERACTING KINASE 3 [Sorghum bicolor]
47	Sobic.001G207800	72.1297	9.8361	2.26709	4.33864	1.43e-05	0.00182909	XP_002467019.1 WAT1-related protein At3g02690
160	Sobic.002G182150	51.5401	-9.79631	2.26017	-4.33433	1.46e-05	0.00185443	XP_021302777.1 uncharacterized protein LOC8058288 [Sorghum bicolor]
538	Sobic.008G009900	492.821	-3.61274	0.834717	-4.3281	1.5e-05	0.00189657	NA
357	Sobic.004G223500	68.0574	-10.109	2.33985	-4.32036	1.56e-05	0.00194838	XP_021314561.1 wall-associated receptor kinase 3 [Sorghum bicolor]
658	Sobic.010G145200	433.223	-6.08806	1.4094	-4.31961	1.56e-05	0.00194838	XP_002437033.1 transcription factor bHLH144 [Sorghum bicolor]
480	Sobic.006G201400	247.692	4.14187	0.962681	4.30243	1.69e-05	0.00209369	NA
40	Sobic.001G193700	40.4863	-9.25517	2.15584	-4.29307	1.76e-05	0.00217163	NA
299	Sobic.003G418200	68.9434	8.90492	2.08268	4.27571	1.91e-05	0.00232156	XP_021312783.1 spermatogenesis-associated protein 20 isoform X2 [Sorghum bicolor]
545	Sobic.008G027200	1207.93	14.1449	3.30777	4.27626	1.9e-05	0.00232156	XP_002442761.1 putative disease resistance protein At3g14460 [Sorghum bicolor]
54	Sobic.001G231800	72.6599	-9.14012	2.1384	-4.27427	1.92e-05	0.00232357	XP_002464536.1 putative glycine-rich cell wall structural protein 1 [Sorghum bicolor]
118	Sobic.002G022000	56.2032	9.8211	2.30364	4.2633	2.01e-05	0.00240698	XP_002461400.2 uncharacterized protein LOC8059905 [Sorghum bicolor]
149	Sobic.002G118500	49.358	-9.73303	2.28287	-4.2635	2.01e-05	0.00240698	XP_002459768.2 LOW QUALITY PROTEIN: FBD-associated F-box protein At5g60610 [Sorghum bicolor]
347	Sobic.004G172800	95.0895	10.2163	2.39668	4.26269	2.02e-05	0.00240698	XP_002453966.2 uncharacterized protein LOC8064251 [Sorghum bicolor]
200	Sobic.002G376700	297.098	6.94691	1.63144	4.25815	2.06e-05	0.00244295	XP_021308837.1 calcium-binding protein 5-like [Sorghum bicolor]
405	Sobic.005G123700	52.9259	9.75138	2.29796	4.2435	2.2e-05	0.00259401	XP_021319199.1 uncharacterized protein LOC8086457 [Sorghum bicolor]
504	Sobic.007G039500	75.2229	-9.92453	2.33994	-4.24136	2.22e-05	0.00260465	XP_002445047.2 aquaporin NIP3-2 [Sorghum bicolor]
584	Sobic.008G157500	73.3297	-6.95806	1.64115	-4.23975	2.24e-05	0.00260934	XP_021301546.1 BURP domain-containing protein 3 [Sorghum bicolor]
56	Sobic.001G238400	37.3081	-9.28951	2.19483	-4.23245	2.31e-05	0.00268107	XP_002464573.1 expansin-A31 [Sorghum bicolor]
577	Sobic.008G139900	115.076	8.9449	2.11545	4.22837	2.35e-05	0.00271564	XP_021301464.1 uncharacterized protein LOC110429606 isoform X1 [Sorghum bicolor]
389	Sobic.005G053950	61.8726	-8.59084	2.03596	-4.21956	2.45e-05	0.00280902	NA
337	Sobic.004G117000	105.555	5.91342	1.40286	4.21525	2.5e-05	0.00284814	XP_002451904.1 putative disease resistance protein RGA3 [Sorghum bicolor]
148	Sobic.002G112850	80.3513	-6.87883	1.63829	-4.19879	2.68e-05	0.00304713	XP_021311908.1 protein FAR1-RELATED SEQUENCE 5 [Sorghum bicolor]
185	Sobic.002G321100	47.473	-9.67788	2.3102	-4.18919	2.8e-05	0.00316246	XP_021308052.1 putative disease resistance protein RGA3 [Sorghum bicolor]
266	Sobic.003G252850	44.3603	-8.81247	2.10423	-4.18798	2.81e-05	0.00316286	NA
208	Sobic.003G034100	236.032	-4.02499	0.962486	-4.18187	2.89e-05	0.00321577	NA
273	Sobic.003G260100	46.0423	-9.00901	2.15401	-4.18243	2.88e-05	0.00321577	ONM62994.1 CRY1-like protein 2 [Zea mays]
108	Sobic.001G519700	335.993	5.69947	1.36793	4.1665	3.09e-05	0.00342283	XP_002465932.1 uncharacterized protein At4g15970 [Sorghum bicolor]
611	Sobic.009G040900	604.812	3.44121	0.826511	4.16354	3.13e-05	0.00344984	XP_021302675.1 sucrose-phosphatase 2 [Sorghum bicolor]	Catalyzes the final step of sucrose synthesis. Inactive with fructose 6-phosphate as substrate.
355	Sobic.004G218100	197.084	-6.26406	1.50602	-4.15935	3.19e-05	0.00349608	XP_002454185.1 protein ECERIFERUM 1 [Sorghum bicolor]
554	Sobic.008G052000	69.3202	-10.0323	2.41327	-4.15715	3.22e-05	0.00351214	XP_002442887.2 fatty acid amide hydrolase [Sorghum bicolor]
72	Sobic.001G302400	128.198	7.63308	1.83767	4.15368	3.27e-05	0.00351839	XP_004983701.1 flavin-containing monooxygenase FMO GS-OX-like 2 [Setaria italica]
128	Sobic.002G055500	73.4213	8.55352	2.05944	4.15332	3.28e-05	0.00351839	XP_002461548.1 uncharacterized protein LOC8060744 [Sorghum bicolor]
578	Sobic.008G146000	88.5773	-8.83391	2.12688	-4.15346	3.27e-05	0.00351839	NA
98	Sobic.001G400900	143.775	-8.2469	1.98928	-4.14566	3.39e-05	0.00362013	XP_002468006.1 pathogenesis-related protein 1 [Sorghum bicolor]
457	Sobic.006G132100	70.5634	-9.01654	2.1775	-4.14078	3.46e-05	0.00368	NA
665	Sobic.010G167601	56.0517	-9.59569	2.31871	-4.13837	3.5e-05	0.00370066	NA
346	Sobic.004G171600	46.1283	-9.63509	2.33603	-4.12455	3.71e-05	0.00391092	XP_002452243.1 transcription factor bHLH95 [Sorghum bicolor]
392	Sobic.005G062600	37.0018	-9.08907	2.20499	-4.12204	3.76e-05	0.00393466	XP_002449108.1 MLO-like protein 4 [Sorghum bicolor]
23	Sobic.001G079300	49.3344	-9.70583	2.35743	-4.11712	3.84e-05	0.00400036	NA
590	Sobic.008G177950	48.791	9.63407	2.34155	4.1144	3.88e-05	0.00400928	NA
670	Sobic.010G180600	55.9516	9.82929	2.38873	4.11485	3.87e-05	0.00400928	NA
58	Sobic.001G243901	46.9283	-8.95043	2.17987	-4.10594	4.03e-05	0.00413918	XP_020201512.1 uncharacterized protein LOC109787361 [Aegilops tauschii subsp. tauschii]
150	Sobic.002G118801	298.82	-5.85709	1.42741	-4.10331	4.07e-05	0.00414231	XP_022679563.1 uncharacterized protein LOC111256222 [Setaria italica]
151	Sobic.002G128400	81.6476	9.97488	2.43142	4.1025	4.09e-05	0.00414231	XP_002459807.1 WRKY transcription factor 6 [Sorghum bicolor]
204	Sobic.003G014400	45.3764	-8.83006	2.15231	-4.10259	4.09e-05	0.00414231	XP_002457111.1 uncharacterized protein LOC8081384 [Sorghum bicolor]
147	Sobic.002G109500	330.522	-3.71011	0.905339	-4.09803	4.17e-05	0.00420337	XP_021310296.1 putative lipid-transfer protein DIR1 [Sorghum bicolor]
308	Sobic.003G445100	300.149	3.62913	0.886265	4.09486	4.22e-05	0.00424163	XP_002457031.1 glycine-rich RNA-binding protein 4
527	Sobic.007G212100	45.99	-8.63694	2.11008	-4.09318	4.25e-05	0.00425282	XP_002445912.1 serine/threonine-protein kinase UCN [Sorghum bicolor]
124	Sobic.002G046000	63.9358	-8.66679	2.12042	-4.08729	4.36e-05	0.0043422	XP_021310273.1 zinc finger A20 and AN1 domain-containing stress-associated protein 9-like [Sorghum bicolor]
206	Sobic.003G018800	46.0846	-9.46088	2.31666	-4.08384	4.43e-05	0.00438702	PWZ27198.1 GDSL esterase/lipase [Zea mays]
547	Sobic.008G032100	1302.9	-3.7473	0.917932	-4.08233	4.46e-05	0.0043956	XP_002442784.1 uncharacterized protein LOC8074868 [Sorghum bicolor]
87	Sobic.001G358300	58.7087	6.09665	1.49819	4.06933	4.71e-05	0.00452477	XP_021306416.1 transmembrane protein 64 [Sorghum bicolor]
89	Sobic.001G375500	35.1837	-9.14417	2.24654	-4.07034	4.69e-05	0.00452477	XP_002467870.2 protein STRICTOSIDINE SYNTHASE-LIKE 10 [Sorghum bicolor]
336	Sobic.004G112800	460.522	6.10618	1.50009	4.07054	4.69e-05	0.00452477	NA
529	Sobic.007G214050	42.1945	-8.84517	2.1732	-4.07011	4.7e-05	0.00452477	XP_002437257.1 uncharacterized protein LOC8065080 [Sorghum bicolor]
573	Sobic.008G133950	40.1053	-8.77124	2.15432	-4.07147	4.67e-05	0.00452477	NA
588	Sobic.008G170600	57.2705	-8.3259	2.04494	-4.07146	4.67e-05	0.00452477	XP_002443559.2 putative pentatricopeptide repeat-containing protein At1g10330 [Sorghum bicolor]
35	Sobic.001G145700	85.6044	-8.23814	2.02638	-4.06545	4.79e-05	0.00454039	XP_002466712.1 alpha-amylase/trypsin inhibitor [Sorghum bicolor]
65	Sobic.001G276100	67.9177	10.0071	2.46082	4.06656	4.77e-05	0.00454039	XP_002464816.1 protein NRT1/ PTR FAMILY 8.3 isoform X2 [Sorghum bicolor]
303	Sobic.003G429300	55.8336	-9.50423	2.33762	-4.06578	4.79e-05	0.00454039	XP_002456949.1 probable NADPH:quinone oxidoreductase 2 [Sorghum bicolor]
146	Sobic.002G107532	46.9319	-8.51191	2.09448	-4.06398	4.82e-05	0.00454742	NA
400	Sobic.005G110439	49.5757	9.65738	2.37687	4.06306	4.84e-05	0.00454742	NA
464	Sobic.006G152801	45.0382	9.38925	2.31205	4.061	4.89e-05	0.00454843	XP_008669135.1 probable metal-nicotianamine transporter YSL11 [Zea mays]
553	Sobic.008G049701	38.6892	-9.37844	2.30927	-4.06122	4.88e-05	0.00454843	XP_008673376.1 uncharacterized protein LOC100502303 isoform X19 [Zea mays]
11	Sobic.001G044100	43.84	-9.30548	2.2945	-4.05556	5e-05	0.00462824	XP_002463677.2 geraniol 8-hydroxylase [Sorghum bicolor]
676	Sobic.010G214500	86.5519	9.92715	2.44816	4.05494	5.01e-05	0.00462824	NA
641	Sobic.010G076500	45.3756	-9.57514	2.36426	-4.04996	5.12e-05	0.00470779	XP_002436653.1 uncharacterized protein LOC8077317 [Sorghum bicolor]
214	Sobic.003G069700	82.6793	-9.91296	2.45147	-4.04368	5.26e-05	0.00480562	XP_021310885.1 receptor kinase-like protein Xa21 [Sorghum bicolor]
276	Sobic.003G271700	60.9563	-9.24399	2.28632	-4.04317	5.27e-05	0.00480562	XP_021311665.1 uncharacterized protein LOC110433577 [Sorghum bicolor]
84	Sobic.001G339100	44.2868	-9.22917	2.28921	-4.0316	5.54e-05	0.00501651	PWZ55057.1 Glucose-6-phosphate 1-dehydrogenase
568	Sobic.008G103300	177.776	5.96697	1.48022	4.03113	5.55e-05	0.00501651	XP_002443218.1 uncharacterized protein LOC8064295 [Sorghum bicolor]
384	Sobic.005G019300	58.6868	-9.869	2.45128	-4.02607	5.67e-05	0.00510435	RLM58568.1 putative LRR receptor-like serine/threonine-protein kinase [Panicum miliaceum]
630	Sobic.010G004500	37.3747	-8.99171	2.23485	-4.02341	5.74e-05	0.00514089	XP_025882832.1 protein ACCELERATED CELL DEATH 6-like [Oryza sativa Japonica Group]
178	Sobic.002G267300	902.21	-3.70353	0.922623	-4.01414	5.97e-05	0.00530348	XP_002462681.1 nucleolin [Sorghum bicolor]
419	Sobic.005G183000	63.1306	-9.92737	2.47271	-4.01478	5.95e-05	0.00530348	XP_021317829.1 probable disease resistance RPP8-like protein 2 [Sorghum bicolor]
13	Sobic.001G049000	88.2181	-9.83863	2.45595	-4.00604	6.17e-05	0.00544863	XP_021306837.1 F-box/LRR-repeat protein At1g06630 [Sorghum bicolor]
546	Sobic.008G030900	50.3797	-9.5471	2.3833	-4.00583	6.18e-05	0.00544863	NA
452	Sobic.006G106000	57.6854	-6.64829	1.66492	-3.99316	6.52e-05	0.00572496	XP_002447961.1 probable ran guanine nucleotide release factor [Sorghum bicolor]
291	Sobic.003G390500	2945.47	4.43267	1.11244	3.98463	6.76e-05	0.00591066	XP_002458926.1 extensin-2 [Sorghum bicolor]
256	Sobic.003G205600	91.8069	-8.85955	2.22437	-3.98295	6.81e-05	0.00592887	XP_002455880.1 leucine-rich repeat extensin-like protein 3 [Sorghum bicolor]
6	Sobic.001G036050	47.1122	-7.96245	2.00295	-3.97536	7.03e-05	0.0060965	XP_021304491.1 uncharacterized protein LOC8057372 isoform X3 [Sorghum bicolor]
81	Sobic.001G338500	301.76	-5.27088	1.32653	-3.97343	7.08e-05	0.00612169	XP_021307211.1 ACT domain-containing protein ACR4 isoform X1 [Sorghum bicolor]
238	Sobic.003G156766	82.032	7.43547	1.873	3.96982	7.19e-05	0.0061906	XP_021312466.1 myosin-17 [Sorghum bicolor]
168	Sobic.002G222400	76.1696	7.99073	2.01355	3.96848	7.23e-05	0.00620082	XP_021308518.1 uncharacterized protein LOC8081035 [Sorghum bicolor]
257	Sobic.003G207300	331.828	-4.87744	1.23013	-3.96497	7.34e-05	0.00626818	XP_002455890.1 F-box/FBD/LRR-repeat protein At5g22660 [Sorghum bicolor]
479	Sobic.006G193600	45.2316	-8.83668	2.23132	-3.96029	7.49e-05	0.00636719	ACN25750.1 unknown [Zea mays]
228	Sobic.003G124600	35.3538	-8.73536	2.20638	-3.95913	7.52e-05	0.00637302	NA
332	Sobic.004G109500	86.0439	-7.61494	1.92732	-3.95105	7.78e-05	0.00656644	XP_021301300.1 uncharacterized protein LOC110429558 [Sorghum bicolor]
652	Sobic.010G131950	64.996	-9.9028	2.50943	-3.94624	7.94e-05	0.0066739	NA
296	Sobic.003G410900	102.148	7.54373	1.91905	3.93098	8.46e-05	0.00703346	XP_002456882.1 random slug protein 5 [Sorghum bicolor]
435	Sobic.006G005600	47.7886	-9.24855	2.3528	-3.93087	8.46e-05	0.00703346	XP_002447413.1 heat shock protein 82 [Sorghum bicolor]
661	Sobic.010G156000	40.148	8.50189	2.1626	3.93133	8.45e-05	0.00703346	XP_002438500.1 GDSL esterase/lipase At5g45910 [Sorghum bicolor]
91	Sobic.001G377200	41.0781	-8.38264	2.13488	-3.92652	8.62e-05	0.00713448	XP_021311626.1 UDP-glycosyltransferase 88A1 isoform X1 [Sorghum bicolor]
7	Sobic.001G039300	463.569	3.93052	1.00263	3.92022	8.85e-05	0.00729582	XP_002463652.1 uncharacterized protein LOC8057387 [Sorghum bicolor]
352	Sobic.004G207100	100.648	-5.87635	1.50077	-3.91556	9.02e-05	0.00738347	XP_021314214.1 uncharacterized protein LOC8056495 isoform X2 [Sorghum bicolor]
598	Sobic.009G006200	291.034	-4.84612	1.23767	-3.91551	9.02e-05	0.00738347	XP_021303178.1 WAT1-related protein At2g40900 [Sorghum bicolor]
86	Sobic.001G353800	39.5106	-9.4122	2.40703	-3.91029	9.22e-05	0.00746048	XP_002465196.2 probable serine/threonine-protein kinase PBL22 [Sorghum bicolor]
145	Sobic.002G103100	76.4555	6.56561	1.67855	3.91147	9.17e-05	0.00746048	XP_021319551.1 uncharacterized protein LOC110436565 isoform X3 [Sorghum bicolor]
245	Sobic.003G190701	45.1043	9.23526	2.36158	3.91063	9.21e-05	0.00746048	ADP24263.1 transposase [Phyllostachys edulis]
119	Sobic.002G022500	62.6869	9.32533	2.38756	3.90581	9.39e-05	0.00757192	NA
613	Sobic.009G072400	42.0149	8.73614	2.23773	3.90401	9.46e-05	0.00760002	XP_002439417.1 ABC transporter C family member 8 [Sorghum bicolor]
663	Sobic.010G158766	37.0945	-9.31306	2.38929	-3.89784	9.71e-05	0.00776755	AAM94327.1 putative reverse transcriptase [Sorghum bicolor]
506	Sobic.007G052400	34.8186	-8.71539	2.23709	-3.89586	9.79e-05	0.00780252	NA
326	Sobic.004G088700	143.715	-3.85596	0.992444	-3.88531	0.000102198	0.00811935	PWZ25276.1 hypothetical protein [Zea mays]
488	Sobic.006G230800	47.7987	9.50634	2.44745	3.88418	0.000102677	0.00812763	XP_002448597.1 uncharacterized protein LOC8074767 [Sorghum bicolor]
426	Sobic.005G209400	89.9985	8.97314	2.31205	3.88104	0.000104011	0.00820329	XP_002449962.2 putative receptor-like protein kinase At4g00960 [Sorghum bicolor]
263	Sobic.003G234900	74.9798	-6.09502	1.57086	-3.88005	0.000104434	0.00820677	XP_002458218.1 uncharacterized protein LOC8054938 [Sorghum bicolor]
194	Sobic.002G336600	242.894	5.68232	1.46555	3.87726	0.000105637	0.00827136	NA
64	Sobic.001G273000	65.3865	-6.77253	1.74871	-3.87287	0.000107561	0.00839172	XP_021311242.1 protein DETOXIFICATION 33 isoform X2 [Sorghum bicolor]	transmembrane transporter
306	Sobic.003G439501	359.004	-3.41904	0.883652	-3.86921	0.000109189	0.00848816	XP_002456997.1 uncharacterized protein LOC8074120 [Sorghum bicolor]
22	Sobic.001G078000	40.6422	-9.4521	2.44407	-3.86737	0.000110016	0.00852191	XP_002466396.1 uncharacterized protein LOC8083970 [Sorghum bicolor]
425	Sobic.005G208275	52.61	-7.98892	2.06777	-3.86354	0.000111754	0.00862574	XP_021302269.1 uncharacterized protein LOC110429885 [Sorghum bicolor]
354	Sobic.004G211000	131.998	4.95549	1.28346	3.86105	0.000112901	0.00868068	XP_002454156.2 wall-associated receptor kinase 5 [Sorghum bicolor]
420	Sobic.005G189300	65.8905	9.70783	2.51481	3.86026	0.000113266	0.00868068	NA
404	Sobic.005G119900	37.253	8.41199	2.18431	3.85109	0.000117593	0.00897151	XP_021316826.1 berberine bridge enzyme-like 8 [Sorghum bicolor]
505	Sobic.007G041100	41.282	9.22765	2.3965	3.85048	0.000117888	0.00897151	XP_021320625.1 uncharacterized protein LOC8076575 [Sorghum bicolor]
614	Sobic.009G073800	106.093	-7.34841	1.90932	-3.8487	0.000118747	0.00900526	XP_021302889.1 transcription factor BHLH148 isoform X2 [Sorghum bicolor]
269	Sobic.003G256900	122.165	-7.92574	2.06159	-3.84449	0.000120805	0.0090977	XP_002456141.1 aspartyl protease family protein 2 [Sorghum bicolor]
486	Sobic.006G223601	537.975	-5.31497	1.38229	-3.84505	0.00012053	0.0090977	XP_002448565.1 putative disease resistance protein At1g50180 [Sorghum bicolor]
372	Sobic.004G341600	56.3004	7.53312	1.96199	3.83953	0.00012327	0.00925125	XP_002454762.1 5-pentadecatrienyl resorcinol O-methyltransferase-like [Sorghum bicolor]
327	Sobic.004G093400	41.176	-9.42628	2.45804	-3.83487	0.00012563	0.00939583	XP_021314143.1 beta-galactosidase 4 isoform X1 [Sorghum bicolor]
499	Sobic.007G010000	1077.65	-5.93951	1.54986	-3.8323	0.000126952	0.00946205	XP_002444895.2 uncharacterized protein LOC8068538 [Sorghum bicolor]
312	Sobic.004G009700	44.7513	-9.55462	2.49429	-3.83059	0.000127836	0.00949535	NA
458	Sobic.006G132500	205.207	-5.27331	1.37824	-3.82613	0.000130174	0.00963599	XP_002448109.2 uncharacterized protein LOC8060195 [Sorghum bicolor]
501	Sobic.007G010550	38.5188	-8.48066	2.21748	-3.82446	0.000131059	0.00966849	XP_020394706.1 uncharacterized protein LOC100384273 isoform X1 [Zea mays]
215	Sobic.003G073620	80.1247	8.80409	2.30296	3.82294	0.000131871	0.00969539	XP_021310998.1 serum response factor homolog A isoform X3 [Sorghum bicolor]
24	Sobic.001G079401	42.5242	-9.51716	2.49335	-3.81702	0.000135073	0.00989727	NA
71	Sobic.001G300600	36.0592	-8.44348	2.21491	-3.81212	0.00013778	0.0100617	NA
255	Sobic.003G204750	55.4326	-7.74004	2.03356	-3.80615	0.000141148	0.0102731	RLN23682.1 hypothetical protein [Panicum miliaceum]
235	Sobic.003G139300	1072.77	3.59771	0.947958	3.79521	0.000147516	0.0107006	XP_002457701.1 ABC transporter B family member 21 [Sorghum bicolor]	auxin transport
597	Sobic.009G005000	54.1371	9.37235	2.47166	3.79193	0.000149483	0.0108071	XP_002439108.1 probable serine/threonine-protein kinase PBL7 isoform X1 [Sorghum bicolor]
39	Sobic.001G185800	382.786	-3.9812	1.05395	-3.7774	0.000158476	0.0112996	XP_002464323.1 protein DETOXIFICATION 40 [Sorghum bicolor]	vacuolar multi-pass membrane protein
111	Sobic.002G000700	2188.08	-2.84571	0.753485	-3.77673	0.0001589	0.0112996	XP_002459191.1 uncharacterized protein LOC8081572 isoform X2 [Sorghum bicolor]
267	Sobic.003G256550	50.4674	7.56869	2.00257	3.77948	0.000157156	0.0112996	NA
421	Sobic.005G191600	602.505	3.89662	1.0312	3.77874	0.000157627	0.0112996	AAM94323.1 unknown protein [Sorghum bicolor]
474	Sobic.006G181300	39.4216	-8.33149	2.20557	-3.77747	0.000158427	0.0112996	XP_002446944.1 polyphenol oxidase I
633	Sobic.010G018900	46.2614	-8.01691	2.12406	-3.77434	0.000160434	0.0113714	XP_002436399.1 pentatricopeptide repeat-containing protein At1g60770 [Sorghum bicolor]
601	Sobic.009G012500	514.086	-4.44373	1.17766	-3.77336	0.000161062	0.0113788	XP_021303039.1 replication protein A 70 kDa DNA-binding subunit C [Sorghum bicolor]
518	Sobic.007G141340	1179.15	-4.24622	1.12568	-3.77213	0.000161858	0.0113979	NA
94	Sobic.001G391000	32.8851	-8.47099	2.24738	-3.76927	0.000163726	0.0114796	XP_021308560.1 aspartic proteinase nepenthesin-1 [Sorghum bicolor]
132	Sobic.002G064750	65.494	6.19384	1.64354	3.76861	0.000164162	0.0114796	AGR03815.1 mitogen activated protein kinase kinase kinase [Zea mays]
603	Sobic.009G014332	34.1945	9.10598	2.41671	3.76793	0.000164606	0.0114796	NA
393	Sobic.005G072100	212.865	-4.1713	1.10741	-3.76673	0.0001654	0.0114881	XP_021317253.1 protein translocase subunit SECA2
638	Sobic.010G054900	38.3073	8.63811	2.29362	3.76614	0.000165788	0.0114881	NA
581	Sobic.008G151900	41.0626	-7.69635	2.04484	-3.76378	0.000167361	0.0115602	BAT17920.1 Os12g0596101 [Oryza sativa Japonica Group]
224	Sobic.003G108050	71.5686	-9.50527	2.52692	-3.76161	0.000168825	0.0116243	NA
441	Sobic.006G018200	41.2881	-8.93618	2.37806	-3.75776	0.000171444	0.0117672	XP_002446096.1 probable NAD(P)H-dependent oxidoreductase 1 [Sorghum bicolor]
439	Sobic.006G013900	450.326	-2.96479	0.78933	-3.75609	0.000172591	0.0118086	OEL24632.1 DNA-directed RNA polymerases II
467	Sobic.006G165650	31.8835	-9.0928	2.42145	-3.75511	0.000173269	0.0118177	XP_002448260.1 histone-lysine N-methyltransferase
1	Sobic.001G009300	891.031	3.41534	0.914498	3.73466	0.00018797	0.0127402	ACG37630.1 derlin-2 [Zea mays]
20	Sobic.001G077300	46.6043	-8.33372	2.23118	-3.73511	0.000187633	0.0127402	XP_021307282.1 thioredoxin-like protein HCF164
662	Sobic.010G157800	61.151	-9.45361	2.53728	-3.72588	0.000194636	0.013151	XP_021305942.1 uncharacterized protein LOC110431290 isoform X1 [Sorghum bicolor]
88	Sobic.001G368300	67.1629	-6.14277	1.6498	-3.72335	0.000196599	0.0132423	OEL16823.1 E3 ubiquitin-protein ligase SINAT5
648	Sobic.010G114500	52.4076	-9.76747	2.6246	-3.72151	0.000198037	0.0132979	XP_002436851.1 tetraspanin-8 [Sorghum bicolor]
188	Sobic.002G323900	48.666	9.59301	2.58492	3.71115	0.00020632	0.0138114	XP_002462949.1 uncharacterized protein LOC8080147 [Sorghum bicolor]
600	Sobic.009G008100	695.859	3.6364	0.981773	3.70391	0.000212304	0.0141682	OEL18467.1 tRNA pseudouridine synthase B
127	Sobic.002G050100	35.9704	-8.4599	2.28838	-3.6969	0.000218246	0.0145062	XP_002459410.1 non-specific lipid transfer protein GPI-anchored 2 [Sorghum bicolor]
274	Sobic.003G263001	252.057	-6.18729	1.67389	-3.69637	0.000218707	0.0145062	XP_021311719.1 LEAF RUST 10 DISEASE-RESISTANCE LOCUS RECEPTOR-LIKE PROTEIN KINASE-like 2.1 isoform X2 [Sorghum bicolor]
277	Sobic.003G277100	34.8094	-8.3962	2.27277	-3.69427	0.000220524	0.0145821	XP_002458407.1 pentatricopeptide repeat-containing protein At1g08070
338	Sobic.004G120300	80.4296	-9.38792	2.54292	-3.69179	0.000222679	0.0146799	XP_021315139.1 uncharacterized protein LOC110434748 [Sorghum bicolor]
232	Sobic.003G134700	65.3818	9.36654	2.53956	3.68825	0.000225798	0.0148404	XP_002447950.1 lipoyl synthase
560	Sobic.008G074100	39.1721	-9.32992	2.53629	-3.67857	0.000234546	0.0153688	OEL37883.1 putative pentatricopeptide repeat-containing protein
619	Sobic.009G115050	65.6049	-6.89849	1.87653	-3.67619	0.000236741	0.0154659	AAX95750.1 Eukaryotic protein of unknown function (DUF889)
453	Sobic.006G107200	1065.76	-3.3381	0.908311	-3.67507	0.000237788	0.0154876	NA
15	Sobic.001G053500	92.0428	-8.46573	2.30452	-3.67353	0.000239225	0.0155346	XP_002463726.1 uncharacterized protein LOC8081236 [Sorghum bicolor]
173	Sobic.002G256601	67.54	-6.14082	1.67614	-3.66366	0.000248637	0.0160976	XP_002454271.2 uncharacterized protein LOC8066422 [Sorghum bicolor]
144	Sobic.002G098800	31.9868	-8.8633	2.4218	-3.6598	0.000252414	0.0162935	XP_021308149.1 uncharacterized protein LOC110432319 [Sorghum bicolor]
270	Sobic.003G257650	37.5616	-8.04256	2.19802	-3.65899	0.000253206	0.0162961	NA
154	Sobic.002G136900	29.0418	-8.44017	2.30895	-3.65541	0.000256774	0.0164768	XP_021310651.1 uncharacterized protein LOC110433188 isoform X2 [Sorghum bicolor]
562	Sobic.008G079700	408.241	-5.31737	1.45509	-3.65433	0.000257853	0.0164973	ACE86393.1 putative retroelement protein [Sorghum bicolor]
167	Sobic.002G221900	96.5115	6.83823	1.87192	3.65305	0.000259143	0.016531	XP_002462474.1 1-aminocyclopropane-1-carboxylate oxidase 1 [Sorghum bicolor]
587	Sobic.008G165266	27.0804	-8.66319	2.37399	-3.64921	0.000263046	0.0167308	XP_021302146.1 putative serine/threonine-protein kinase isoform X1 [Sorghum bicolor]
589	Sobic.008G175966	55.2148	-7.71633	2.11508	-3.64824	0.000264042	0.0167451	NA
73	Sobic.001G304900	148.007	3.77747	1.03612	3.64578	0.000266577	0.0168565	XP_002467530.2 uncharacterized protein LOC8058757 [Sorghum bicolor]
259	Sobic.003G214650	34.7069	-9.18114	2.51982	-3.64357	0.000268883	0.0169467	NA
417	Sobic.005G168400	36.2212	-9.25337	2.5401	-3.64292	0.000269566	0.0169467	XP_002451026.1 serine/arginine repetitive matrix protein 1 [Sorghum bicolor]
414	Sobic.005G162000	32.291	8.87238	2.4366	3.6413	0.000271265	0.0170042	XP_002449737.2 obtusifoliol 14-alpha demethylase [Sorghum bicolor]
334	Sobic.004G112500	41.6305	8.17046	2.24597	3.63784	0.000274937	0.0171848	XP_008674612.1 unconventional prefoldin RPB5 interactor-like isoform X1 [Zea mays]
155	Sobic.002G163500	34.2525	-8.09323	2.22582	-3.63606	0.000276841	0.0172541	XP_021309372.1 uncharacterized protein LOC110432822 [Sorghum bicolor]
169	Sobic.002G223500	120.485	-4.20522	1.15845	-3.63003	0.000283383	0.0176112	XP_002460319.1 uncharacterized protein LOC8062774 [Sorghum bicolor]
609	Sobic.009G037200	30.0481	-9.00541	2.48458	-3.62451	0.000289507	0.0179404	XP_002440560.1 benzyl alcohol O-benzoyltransferase [Sorghum bicolor]
564	Sobic.008G085200	38.9584	8.31309	2.29466	3.62279	0.000291439	0.0180086	NA
314	Sobic.004G018500	354.631	-3.4589	0.955271	-3.62086	0.000293631	0.0180925	XP_002453216.2 atherin [Sorghum bicolor]
243	Sobic.003G180900	493.546	-2.97975	0.823936	-3.61648	0.000298639	0.0182456	NA
278	Sobic.003G278200	29.0808	-8.69264	2.4035	-3.61666	0.000298424	0.0182456	XP_021311975.1 potassium channel KAT4 [Sorghum bicolor]	Probable inward-rectifying potassium channel. Assuming opened or closed conformations in response to the voltage difference across the membrane, the channel is activated by hyperpolarization
639	Sobic.010G060100	36.2583	9.20177	2.54392	3.61716	0.000297851	0.0182456	XP_002436591.2 probable 2-oxoglutarate-dependent dioxygenase ANS [Sorghum bicolor]
377	Sobic.004G359300	145.418	-4.42929	1.22583	-3.61329	0.000302338	0.0184197	NA
677	Sobic.010G222600	31.4972	-8.27875	2.29226	-3.6116	0.00030431	0.0184879	OEL13882.1 BTB/POZ and MATH domain-containing protein 2 [Dichanthelium oligosanthes]
34	Sobic.001G129700	38.2276	-8.42384	2.33413	-3.60898	0.000307406	0.0186238	XP_002464052.1 germin-like protein 3-5 [Sorghum bicolor]
678	Sobic.010G222900	51.258	-8.77514	2.43283	-3.60697	0.000309797	0.0187164	XP_021304407.1 protein PRD1 [Sorghum bicolor]
159	Sobic.002G182000	464.347	-2.79803	0.776554	-3.60313	0.000314404	0.0188989	XP_021307898.1 zinc finger CCCH domain-containing protein 59 [Sorghum bicolor]
666	Sobic.010G173700	31.5309	-9.06475	2.51589	-3.603	0.000314561	0.0188989	XP_002438604.1 tetraspanin-2 [Sorghum bicolor]
669	Sobic.010G176600	59.3114	-9.29444	2.581	-3.60109	0.000316881	0.0189857	XP_021305820.1 probable pathogenesis-related protein ARB_02861 isoform X1 [Sorghum bicolor]
682	Sobic.010G278500	186.877	4.88059	1.35579	3.5998	0.000318466	0.0190282	NA
313	Sobic.004G012000	110.208	5.63291	1.56555	3.59805	0.000320613	0.0190514	XP_021314883.1 transcription factor ILR3-like isoform X2 [Sorghum bicolor]
339	Sobic.004G121200	33.8995	-9.146	2.54147	-3.5987	0.00031981	0.0190514	PWZ06770.1 Sinapine esterase [Zea mays]
68	Sobic.001G293800	70.9067	-4.47934	1.2455	-3.59643	0.000322612	0.0191179	XP_015614593.1 beta-amylase 3
249	Sobic.003G195800	30.8567	-9.03821	2.51361	-3.59571	0.000323502	0.0191184	NA
166	Sobic.002G206500	920.851	-5.87999	1.63858	-3.58847	0.00033263	0.0196044	BAT08545.1 Os09g0469900 [Oryza sativa Japonica Group]
301	Sobic.003G422000	55.1626	-7.5114	2.09426	-3.58666	0.000334945	0.0196738	XP_002459077.1 glucan endo-1
429	Sobic.005G217900	39.4652	-7.20473	2.00905	-3.58613	0.000335623	0.0196738	XP_021316496.1 uncharacterized protein LOC110435350 [Sorghum bicolor]
575	Sobic.008G136700	80.6612	8.40165	2.34343	3.58519	0.000336828	0.0196913	XP_021301305.1 uncharacterized protein LOC8074237 isoform X2 [Sorghum bicolor]
207	Sobic.003G022500	39.1968	-9.29496	2.59729	-3.57871	0.000345297	0.0201321	XP_002457148.1 uncharacterized protein LOC8079526 [Sorghum bicolor]
551	Sobic.008G043700	65.241	5.56133	1.55457	3.5774	0.000347026	0.0201786	XP_002441862.1 uncharacterized protein LOC8073466 [Sorghum bicolor]
487	Sobic.006G229700	30.9752	-8.67471	2.42538	-3.57665	0.000348029	0.0201829	NA
558	Sobic.008G067200	28.4349	-8.41213	2.35471	-3.57248	0.000353619	0.0204524	XP_002442971.1 subtilisin inhibitor [Sorghum bicolor]
684	Sobic.K044414	54.7374	-9.25465	2.59128	-3.57146	0.000354996	0.0204774	XP_021311549.1 B3 domain-containing protein Os06g0194400 isoform X1 [Sorghum bicolor]
440	Sobic.006G015250	50.0124	-9.31136	2.61663	-3.55854	0.000372927	0.0214547	RLN30340.1 uncharacterized protein [Panicum miliaceum]
423	Sobic.005G205550	38.2884	-9.21669	2.59172	-3.5562	0.000376256	0.0215889	XP_021313265.1 LEAF RUST 10 DISEASE-RESISTANCE LOCUS RECEPTOR-LIKE PROTEIN KINASE-like 2.1 [Sorghum bicolor]
30	Sobic.001G100700	39.4128	8.9994	2.53164	3.55477	0.000378316	0.0216499	XP_002463923.1 uncharacterized protein LOC8060518 [Sorghum bicolor]
77	Sobic.001G319300	39.4185	-9.21619	2.59954	-3.54532	0.00039214	0.0221117	XP_002467622.2 uncharacterized protein LOC8063175 [Sorghum bicolor]
78	Sobic.001G330850	43.8086	8.13886	2.29582	3.54507	0.000392504	0.0221117	NA
292	Sobic.003G395000	32.3961	-9.12508	2.57311	-3.54632	0.000390654	0.0221117	XP_002456807.1 cysteine proteinase EP-B 2 [Sorghum bicolor]
495	Sobic.007G003200	46.4599	-9.30995	2.62382	-3.54825	0.000387801	0.0221117	XP_021306170.1 berberine bridge enzyme-like 18 [Sorghum bicolor]
533	Sobic.008G003400	40.7268	-9.27397	2.61588	-3.54525	0.000392234	0.0221117	XP_002442648.2 monothiol glutaredoxin-S12
637	Sobic.010G053400	66.7364	-6.30984	1.77968	-3.54549	0.000391883	0.0221117	XP_021305128.1 uncharacterized protein LOC8070894 [Sorghum bicolor]
624	Sobic.009G204100	59.6399	5.93952	1.67591	3.54406	0.000394016	0.0221394	XP_002440106.1 uncharacterized protein LOC8068950 [Sorghum bicolor]
5	Sobic.001G031300	38.7581	8.87395	2.50505	3.54242	0.000396469	0.0221624	XP_002463612.2 pentatricopeptide repeat-containing protein At1g74850
370	Sobic.004G326900	276.581	-3.22021	0.908902	-3.54297	0.000395647	0.0221624	XP_002452964.1 UDP-glucuronate 4-epimerase 1 [Sorghum bicolor]
561	Sobic.008G075350	46.4148	9.20607	2.60051	3.54011	0.000399965	0.0223004	AAV43959.2 putative polyprotein [Oryza sativa Japonica Group]
411	Sobic.005G140200	28.6347	8.51526	2.40868	3.53524	0.000407407	0.022657	XP_021317554.1 chloroplast envelope quinone oxidoreductase homolog [Sorghum bicolor]
556	Sobic.008G057300	72.7462	-5.88541	1.66705	-3.53044	0.000414873	0.0230132	XP_002441915.2 phytosulfokine receptor 1 [Sorghum bicolor]
576	Sobic.008G139000	848.095	-5.72935	1.62419	-3.52751	0.000419487	0.0232098	XP_002443405.1 uncharacterized protein LOC8074247 [Sorghum bicolor]
320	Sobic.004G045566	88.2274	-5.45174	1.54582	-3.52676	0.000420673	0.0232162	ACN27538.1 unknown [Zea mays]
205	Sobic.003G015900	44.4731	9.48592	2.6913	3.52466	0.000424025	0.0233189	NA
465	Sobic.006G159100	177.753	4.07291	1.15568	3.52425	0.000424683	0.0233189	XP_002446849.1 transcription factor LAF1 [Sorghum bicolor]
236	Sobic.003G149900	33.0993	8.0767	2.29241	3.52324	0.000426306	0.0233489	NA
137	Sobic.002G078300	50.4909	9.44805	2.68321	3.52117	0.000429644	0.0234724	XP_002459553.1 acyl carrier protein 1
447	Sobic.006G088000	270.953	3.3213	0.944745	3.51555	0.000438845	0.0239149	XP_002447878.1 protein TIC 40
592	Sobic.008G182800	118.734	-7.06594	2.0109	-3.51382	0.000441707	0.0240105	XP_002442584.1 thaumatin-like pathogenesis-related protein 4 [Sorghum bicolor]
162	Sobic.002G185600	44.6949	-6.41171	1.82558	-3.51215	0.000444495	0.0240415	XP_020396735.1 uncharacterized protein LOC103632660 [Zea mays]
403	Sobic.005G117200	61.4031	8.26554	2.35304	3.51271	0.000443555	0.0240415	XP_021305918.1 putative receptor-like protein kinase At4g00960 isoform X2 [Sorghum bicolor]
136	Sobic.002G076200	192.861	-4.96892	1.41577	-3.5097	0.000448613	0.0242039	NA
526	Sobic.007G209000	34.3428	-8.49002	2.42385	-3.5027	0.000460575	0.0247876	XP_002444764.1 uncharacterized protein LOC8064018 [Sorghum bicolor]
399	Sobic.005G105700	59.8098	-6.90424	1.97268	-3.49993	0.000465381	0.0249843	XP_002449410.1 carotenoid cleavage dioxygenase 8 homolog A
309	Sobic.003G445600	25.8534	-8.48132	2.43226	-3.48701	0.000488458	0.0261584	XP_002457032.1 protein NETWORKED 2B [Sorghum bicolor]
67	Sobic.001G292500	69.9874	-4.76675	1.36785	-3.48485	0.000492405	0.0263048	XP_002457221.1 polynucleotide 5'-hydroxyl-kinase NOL9 [Sorghum bicolor]
92	Sobic.001G379500	91.4757	-5.96508	1.71268	-3.4829	0.000496013	0.0264325	XP_002465307.1 WEB family protein At2g38370 [Sorghum bicolor]
44	Sobic.001G203200	361.028	-3.04079	0.874735	-3.47625	0.000508484	0.0268988	XP_002466985.1 calcium uniporter protein 2
180	Sobic.002G290000	263.146	3.74014	1.07577	3.47671	0.000507603	0.0268988	XP_021308235.1 Fanconi anemia group J protein homolog [Sorghum bicolor]
653	Sobic.010G132500	35.02	8.96908	2.57959	3.47693	0.000507183	0.0268988	XP_021304503.1 uncharacterized protein LOC8078255 isoform X2 [Sorghum bicolor]
264	Sobic.003G244100	36.4305	-8.25363	2.376	-3.47375	0.000513237	0.0270842	XP_021310900.1 G-box-binding factor 3-like [Sorghum bicolor]
376	Sobic.004G354500	39.2803	9.17146	2.641	3.47273	0.000515199	0.0271217	XP_002453087.2 uncharacterized protein LOC8084451 [Sorghum bicolor]
157	Sobic.002G175550	60.4338	8.35598	2.40812	3.46991	0.000520631	0.027278	CAD40278.2 OSJNBb0062H02.17 [Oryza sativa Japonica Group]
491	Sobic.006G244200	29.0684	8.2628	2.38129	3.46988	0.000520683	0.027278	XP_002447232.1 uncharacterized protein LOC8068495 [Sorghum bicolor]
418	Sobic.005G171001	1344.2	-4.08344	1.17822	-3.46576	0.000528729	0.0276328	XP_021317803.1 uncharacterized protein LOC110435993 [Sorghum bicolor]
664	Sobic.010G166000	46.493	9.03165	2.61635	3.452	0.000556454	0.0290119	XP_002437144.1 leucine-rich repeat extensin-like protein 5 isoform X2 [Sorghum bicolor]
102	Sobic.001G432200	121.785	-4.60618	1.33649	-3.44647	0.000567961	0.0295408	RLN43139.1 hypothetical protein [Panicum miliaceum]
12	Sobic.001G046900	28.4304	-8.58625	2.49541	-3.44081	0.000579966	0.030093	XP_021306676.1 photosystem I reaction center subunit II
115	Sobic.002G018133	285.045	-5.09153	1.48122	-3.4374	0.000587334	0.0302962	XP_021308233.1 uncharacterized protein LOC110432342 [Sorghum bicolor]
516	Sobic.007G116100	232.821	-3.36843	0.979798	-3.43788	0.000586277	0.0302962	NA
565	Sobic.008G085600	30.4517	-8.97019	2.61033	-3.43641	0.000589469	0.0302962	NA
607	Sobic.009G034800	50.4315	-6.72693	1.95719	-3.43703	0.000588123	0.0302962	XP_021304147.1 probable WRKY transcription factor 31 isoform X2 [Sorghum bicolor]
343	Sobic.004G149600	44.5195	6.90401	2.01067	3.43369	0.000595422	0.0305298	XP_021319551.1 uncharacterized protein LOC110436565 isoform X3 [Sorghum bicolor]
521	Sobic.007G150500	25.9146	-8.39311	2.44489	-3.43293	0.000597104	0.0305439	XP_021321379.1 two-component response regulator ORR33 [Sorghum bicolor]
380	Sobic.005G011100	34.3505	-7.1104	2.07365	-3.42893	0.000605972	0.0308519	XP_002450131.2 GDSL esterase/lipase At5g03610 [Sorghum bicolor]
549	Sobic.008G038000	34.6161	-9.14681	2.66707	-3.42953	0.000604627	0.0308519	XP_002442814.1 uncharacterized protein LOC8066974 [Sorghum bicolor]
29	Sobic.001G096200	29.7177	-7.84132	2.29217	-3.42092	0.000624095	0.0317002	NP_001148861.1 uncharacterized protein LOC100282480 [Zea mays]
621	Sobic.009G181000	36.8375	-9.00185	2.63308	-3.41875	0.000629092	0.0318794	NA
190	Sobic.002G327300	47.5549	-6.94731	2.03278	-3.41764	0.000631669	0.0319353	NA
143	Sobic.002G097601	10267.6	-5.76106	1.69057	-3.40776	0.000654993	0.033016	BAD82036.1 hypothetical protein [Oryza sativa Japonica Group]
203	Sobic.002G426201	33.6293	-7.72043	2.26585	-3.4073	0.000656088	0.033016	XP_002463430.1 nicotianamine synthase 3 [Sorghum bicolor]
225	Sobic.003G112001	55.4553	-8.88625	2.6133	-3.40039	0.000672887	0.033744	XP_021312892.1 uncharacterized protein LOC110433961 [Sorghum bicolor]
240	Sobic.003G175201	46.6495	8.55512	2.51662	3.39945	0.000675222	0.033744	XP_015634909.1 probable LRR receptor-like serine/threonine-protein kinase At1g56140
492	Sobic.006G248600	23.4285	-8.38888	2.46728	-3.40006	0.000673717	0.033744	XP_025877470.1 uncharacterized protein LOC112936996 [Oryza sativa Japonica Group]
83	Sobic.001G339000	48.9828	-9.07783	2.67238	-3.39691	0.000681526	0.0339807	XP_002465137.1 alpha-copaene synthase isoform X1 [Sorghum bicolor]
481	Sobic.006G202700	29.5805	7.87647	2.3196	3.39562	0.00068474	0.0340627	XP_002448454.1 ubiquinol oxidase 1b
27	Sobic.001G091100	58.6158	9.28154	2.73522	3.39335	0.000690446	0.0342679	XP_002454148.2 serine/arginine repetitive matrix protein 1 [Sorghum bicolor]
331	Sobic.004G108001	52.4097	8.9884	2.64941	3.39261	0.000692314	0.0342822	XP_015688571.1 glutathione S-transferase T3-like [Oryza brachyantha]
455	Sobic.006G118850	25.7999	-8.68222	2.56043	-3.39092	0.00069659	0.0344154	NA
217	Sobic.003G079750	29.446	8.09102	2.3877	3.38862	0.000702441	0.0346256	XP_004968137.1 LEAF RUST 10 DISEASE-RESISTANCE LOCUS RECEPTOR-LIKE PROTEIN KINASE-like 2.4 [Setaria italica]
114	Sobic.002G009900	131.74	-5.16104	1.52432	-3.3858	0.000709706	0.0349043	XP_002459231.1 LRR receptor-like serine/threonine-protein kinase RPK2 [Sorghum bicolor]
428	Sobic.005G212201	190.98	5.9631	1.76171	3.38483	0.000712227	0.0349491	XP_002462367.1 pentatricopeptide repeat-containing protein At5g56310 [Sorghum bicolor]
651	Sobic.010G119800	128.331	3.80717	1.12779	3.37577	0.000736093	0.0360386	CAE04255.4 OSJNBa0089N06.16 [Oryza sativa Japonica Group]
70	Sobic.001G294500	26.3361	8.06	2.38976	3.37273	0.000744277	0.0361533	XP_002464917.1 phospho-2-dehydro-3-deoxyheptonate aldolase 2
329	Sobic.004G101700	59.8838	9.23293	2.73722	3.37311	0.00074325	0.0361533	NA
555	Sobic.008G055432	30.1253	-8.30921	2.46387	-3.37242	0.000745103	0.0361533	XP_021302092.1 cysteine-rich receptor-like protein kinase 25 [Sorghum bicolor]
631	Sobic.010G004701	140.729	-5.14866	1.52615	-3.37363	0.000741832	0.0361533	NA
9	Sobic.001G042500	35.3506	-9.01302	2.67752	-3.36618	0.000762177	0.0366538	XP_002463666.1 protein CDI [Sorghum bicolor]
139	Sobic.002G082350	36.852	-7.95831	2.36401	-3.36644	0.00076144	0.0366538	OEL31530.1 Protein LURP-one-related 15 [Dichanthelium oligosanthes]
171	Sobic.002G254100	30.1689	-9.02193	2.67874	-3.36797	0.000757231	0.0366538	XP_002460475.2 uncharacterized protein LOC8055896 [Sorghum bicolor]
374	Sobic.004G348600	260.899	4.04509	1.20137	3.36707	0.000759715	0.0366538	NA
201	Sobic.002G377800	28.3273	7.82109	2.32809	3.35944	0.000780993	0.0374756	XP_021308774.1 uncharacterized protein LOC8079204 [Sorghum bicolor]
416	Sobic.005G165900	316.605	4.0271	1.19944	3.35748	0.000786552	0.037659	XP_021317528.1 probable E3 ubiquitin-protein ligase RHY1A isoform X2 [Sorghum bicolor]
640	Sobic.010G071500	27.6792	-8.04637	2.39793	-3.35555	0.000792084	0.0378403	XP_025812713.1 uncharacterized protein LOC112890081 [Panicum hallii]
175	Sobic.002G261900	162.301	3.8823	1.15743	3.35425	0.000795794	0.0378508	XP_021308123.1 UPF0664 stress-induced protein C29B12.11c [Sorghum bicolor]
219	Sobic.003G083000	25.4854	-8.19068	2.44161	-3.35462	0.000794748	0.0378508	XP_021311434.1 uncharacterized protein LOC8061353 [Sorghum bicolor]
109	Sobic.001G523100	25.8364	-8.4083	2.50881	-3.35152	0.000803707	0.038022	XP_021320686.1 uncharacterized protein LOC110437020 isoform X2 [Sorghum bicolor]
122	Sobic.002G036000	63.6898	-6.07698	1.81338	-3.35119	0.000804653	0.038022	RLM86838.1 hypothetical protein [Panicum miliaceum]
525	Sobic.007G202300	105.66	-3.84797	1.14789	-3.35221	0.000801694	0.038022	XP_021321408.1 uncharacterized protein LOC8062433 [Sorghum bicolor]
469	Sobic.006G166800	25.0392	8.35528	2.49445	3.34955	0.000809422	0.0381642	XP_002448273.1 mavicyanin [Sorghum bicolor]
667	Sobic.010G173800	350.204	3.18428	0.951326	3.3472	0.000816324	0.0384062	XP_002437187.1 beta-galactosidase 9 [Sorghum bicolor]	cabohydrate metabolism
606	Sobic.009G024166	24.5713	-8.71943	2.60616	-3.3457	0.00082076	0.0385313	XP_021321354.1 uncharacterized protein LOC110437286 [Sorghum bicolor]
430	Sobic.005G220101	58.0115	5.60905	1.67767	3.34336	0.000827703	0.0387733	XP_002450015.2 uncharacterized protein LOC8086003 [Sorghum bicolor]
120	Sobic.002G027600	29.2006	-7.94369	2.37769	-3.34093	0.000834981	0.038946	XP_002461427.1 leucine-rich repeat receptor-like serine/threonine-protein kinase BAM1 [Sorghum bicolor]
574	Sobic.008G134500	87.3073	8.24328	2.46721	3.34113	0.000834378	0.038946	XP_021321909.1 probable LRR receptor-like serine/threonine-protein kinase At1g05700 [Sorghum bicolor]
10	Sobic.001G042901	22.2609	-8.34148	2.49801	-3.33925	0.00084006	0.0390477	XP_002466230.2 adenylate isopentenyltransferase 5
353	Sobic.004G209100	43.1747	-9.07507	2.71804	-3.33883	0.000841325	0.0390477	NA
626	Sobic.009G212700	25.5313	-8.18169	2.45077	-3.33842	0.000842562	0.0390477	XP_021303580.1 ras-related protein Rab-8B isoform X3 [Sorghum bicolor]
398	Sobic.005G096700	146.817	5.1494	1.54339	3.33642	0.000848656	0.0392463	XP_021316951.1 uncharacterized protein LOC110435586 isoform X1 [Sorghum bicolor]
253	Sobic.003G202500	26.9869	-8.41891	2.52403	-3.3355	0.00085146	0.0392922	NA
340	Sobic.004G122800	98.7084	3.62012	1.08659	3.33163	0.000863397	0.0397584	XP_021314149.1 D-amino-acid transaminase
80	Sobic.001G337800	40.7922	-9.01578	2.70739	-3.33007	0.000868253	0.03985	XP_006651502.1 uncharacterized protein LOC102717421 [Oryza brachyantha]
559	Sobic.008G073500	462.607	-3.20896	0.963708	-3.32981	0.000869061	0.03985	XP_021302354.1 protein STICHEL isoform X1 [Sorghum bicolor]
32	Sobic.001G117100	23.0148	-8.12003	2.4403	-3.32747	0.000876398	0.0401017	NA
134	Sobic.002G066600	418.368	4.0478	1.21686	3.32643	0.000879673	0.0401668	NA
363	Sobic.004G284001	92.5181	4.97298	1.49711	3.32173	0.000894625	0.0406782	XP_021315152.1 uncharacterized protein LOC110434755 [Sorghum bicolor]
445	Sobic.006G073150	155.986	-5.31096	1.59869	-3.32207	0.000893511	0.0406782	XP_025824362.1 hydroxycinnamoyltransferase 1 [Panicum hallii]
610	Sobic.009G038200	542.229	3.99847	1.20471	3.31904	0.000903272	0.0409855	AGT16874.1 hypothetical protein [Saccharum hybrid cultivar R570]
514	Sobic.007G095700	51.2629	-6.1106	1.84214	-3.31712	0.000909493	0.0411816	XP_002454095.1 ribosome biogenesis protein BRX1 homolog 1 [Sorghum bicolor]
548	Sobic.008G036100	96.7468	-6.20372	1.87239	-3.31326	0.000922156	0.041668	XP_002441835.1 uncharacterized protein LOC8066964 [Sorghum bicolor]
580	Sobic.008G150500	23.4732	-8.16307	2.46502	-3.31157	0.000927745	0.0418334	NA
383	Sobic.005G017700	23.7632	8.31558	2.51215	3.31014	0.000932481	0.0419597	XP_021316558.1 salt stress-induced protein [Sorghum bicolor]	binds carbohydrates?
517	Sobic.007G123600	112.376	4.49995	1.36044	3.30771	0.000940615	0.0422381	XP_002444316.1 uncharacterized protein LOC8070065 isoform X1 [Sorghum bicolor]
394	Sobic.005G075100	41.5701	7.85827	2.3775	3.30526	0.000948876	0.042521	XP_021317014.1 putative disease resistance protein RGA1 [Sorghum bicolor]
523	Sobic.007G197700	46.1012	8.81629	2.6691	3.30309	0.000956247	0.042675	XP_002445835.1 transcription factor bHLH78 [Sorghum bicolor]
566	Sobic.008G088833	184.823	-5.43452	1.64501	-3.30363	0.000954409	0.042675	XP_021302089.1 uncharacterized protein LOC110429797 isoform X1 [Sorghum bicolor]
683	Sobic.010G279700	322.869	3.21138	0.973088	3.3002	0.000966166	0.0430291	NP_001149009.1 uncharacterized protein LOC100282629 precursor [Zea mays]
4	Sobic.001G027000	30.0285	-8.87816	2.69076	-3.2995	0.000968569	0.0430477	XP_002466161.2 uncharacterized protein LOC8080209 [Sorghum bicolor]
382	Sobic.005G015450	198.495	3.52817	1.07071	3.29516	0.000983652	0.0435396	XP_021316981.1 E3 ubiquitin ligase BIG BROTHER-related [Sorghum bicolor]
498	Sobic.007G008100	32.3018	7.0782	2.14782	3.29553	0.000982375	0.0435396	XP_002444884.1 pectinesterase inhibitor 28 [Sorghum bicolor]
579	Sobic.008G148400	147.521	3.4987	1.06228	3.29358	0.000989208	0.0436964	XP_021302204.1 bifunctional nuclease 1-like isoform X1 [Sorghum bicolor]
76	Sobic.001G309600	575.097	-3.04681	0.925622	-3.29163	0.000996068	0.04391	XP_002467562.1 NEP1-interacting protein 2 [Sorghum bicolor]
177	Sobic.002G265800	291.698	-3.03416	0.923373	-3.28595	0.00101638	0.04439	XP_002460531.1 UDP-glycosyltransferase 74F2 [Sorghum bicolor]
223	Sobic.003G101700	38.8275	-6.61088	2.01106	-3.28727	0.00101165	0.04439	PWZ11277.1 DnaJ subfamily B member 5 [Zea mays]
230	Sobic.003G131000	30.329	-8.87629	2.70147	-3.28573	0.00101719	0.04439	XP_021311447.1 uncharacterized protein LOC8074537 [Sorghum bicolor]
272	Sobic.003G259000	24.8491	-8.53833	2.59683	-3.28798	0.0010091	0.04439	NA
295	Sobic.003G406400	72.7079	-8.12754	2.47352	-3.28582	0.00101685	0.04439	NA
361	Sobic.004G276200	74.4201	-5.46529	1.66427	-3.2839	0.0010238	0.0445887	NA
623	Sobic.009G201500	168.355	-6.39917	1.9512	-3.2796	0.00103955	0.0451839	XP_002441398.1 chaperone protein ClpB1 [Sorghum bicolor]
618	Sobic.009G114500	52.7695	-5.2158	1.59188	-3.27651	0.00105098	0.0455896	XP_002440977.1 thiamine pyrophosphokinase 1 [Sorghum bicolor]
258	Sobic.003G214000	25.3094	8.59184	2.62499	3.27309	0.00106377	0.0460523	XP_002455922.1 uncharacterized protein LOC8082519 [Sorghum bicolor]
544	Sobic.008G024550	21.443	-8.47163	2.58938	-3.27168	0.0010691	0.0461907	OEL18184.1 hypothetical protein
105	Sobic.001G457200	558.657	-3.66331	1.12185	-3.26543	0.00109299	0.0468242	NA
130	Sobic.002G062350	27.2483	-8.83795	2.70871	-3.26279	0.00110319	0.0468242	XP_015619298.1 uncharacterized protein LOC107279689 [Oryza sativa Japonica Group]
288	Sobic.003G363200	32.6308	-8.94044	2.73664	-3.26695	0.00108714	0.0468242	XP_002458800.1 protein TRANSPARENT TESTA 1 [Sorghum bicolor]
290	Sobic.003G383200	26.2427	8.26872	2.53136	3.26652	0.0010888	0.0468242	XP_021313490.1 uncharacterized protein LOC8062457 isoform X1 [Sorghum bicolor]
412	Sobic.005G141801	38.2148	8.78977	2.69369	3.2631	0.00110202	0.0468242	XP_021316433.1 uncharacterized protein LOC110435314 [Sorghum bicolor]
489	Sobic.006G232900	53.6969	5.35645	1.64114	3.26387	0.00109902	0.0468242	XP_021318509.1 uncharacterized protein LOC8079546 isoform X3 [Sorghum bicolor]
510	Sobic.007G076400	122.389	-3.61815	1.10803	-3.26539	0.00109313	0.0468242	OEL32422.1 hypothetical protein [Dichanthelium oligosanthes]
540	Sobic.008G014000	24.1521	8.60865	2.63696	3.26461	0.00109616	0.0468242	XP_021301636.1 acetylserotonin O-methyltransferase 2 [Sorghum bicolor]
680	Sobic.010G234700	41.9764	9.20601	2.82091	3.26349	0.00110048	0.0468242	XP_002437468.2 uncharacterized protein LOC8083310 [Sorghum bicolor]
351	Sobic.004G198200	22.8269	-7.97176	2.44486	-3.26062	0.00111167	0.0470919	XP_002452369.2 protein POLYCHOME [Sorghum bicolor]
362	Sobic.004G279900	26.5325	-7.93402	2.43636	-3.25651	0.00112791	0.0476866	XP_021315273.1 uncharacterized ATP-dependent helicase C29A10.10c [Sorghum bicolor]
252	Sobic.003G202200	116.959	4.69866	1.44417	3.25353	0.0011398	0.048002	XP_002458070.1 cytokinin riboside 5'-monophosphate phosphoribohydrolase LOG [Sorghum bicolor]
433	Sobic.005G224300	38.5612	-8.87602	2.72808	-3.25358	0.00113959	0.048002	XP_021317286.1 probable O-methyltransferase 2 [Sorghum bicolor]
227	Sobic.003G115400	177.243	4.48419	1.38033	3.24863	0.00115964	0.0487429	NA
342	Sobic.004G129800	66.3648	-6.09141	1.87721	-3.24492	0.00117484	0.0492863	RLN08182.1 protein DETOXIFICATION 16-like isoform X1 [Panicum miliaceum]	Efflux carrier for plant-derived alkaloids, antibiotics, heavy metal and other toxic compounds. Involved in cadmium detoxification. Requires probably a proton-motive force for the efflux.
645	Sobic.010G090700	138.941	-4.97149	1.5324	-3.24426	0.00117756	0.0493053	XP_002438090.1 uncharacterized protein LOC8065509 [Sorghum bicolor]
33	Sobic.001G124600	231.8	4.39184	1.35413	3.24328	0.0011816	0.0493791	NP_001334940.1 uncharacterized protein LOC100277538 [Zea mays]
280	Sobic.003G285300	28.7845	-7.94182	2.4524	-3.23839	0.00120205	0.050137	NA
110	Sobic.001G533200	27.998	8.42131	2.60286	3.23541	0.00121468	0.0505272	XP_002468650.1 early nodulin-like protein 1 [Sorghum bicolor]
634	Sobic.010G024300	147.917	3.35575	1.0373	3.23509	0.00121606	0.0505272	XP_021304928.1 uncharacterized protein LOC8069077 [Sorghum bicolor]
644	Sobic.010G086800	92.1888	4.71826	1.46211	3.22702	0.00125085	0.0518732	XP_002436721.1 blue copper protein [Sorghum bicolor]
163	Sobic.002G192900	204.85	-3.79135	1.17527	-3.22592	0.00125566	0.0519734	XP_021310280.1 AUGMIN subunit 5 isoform X3 [Sorghum bicolor]
69	Sobic.001G294200	2569.96	-2.31717	0.719177	-3.22198	0.00127309	0.0524943	NP_001142083.1 uncharacterized LOC100274243 [Zea mays]
191	Sobic.002G330400	574.363	2.85162	0.884983	3.22223	0.00127199	0.0524943	XP_002460826.1 pentatricopeptide repeat-containing protein At4g18975
226	Sobic.003G112100	27.7425	-8.82141	2.73917	-3.22046	0.00127983	0.0525725	XP_002457563.1 expansin-A9 [Sorghum bicolor]
650	Sobic.010G119100	142.76	-4.92038	1.5277	-3.22078	0.00127844	0.0525725	XP_002437794.1 nuclear transcription factor Y subunit B-3 [Sorghum bicolor]
531	Sobic.007G220150	23.2355	-8.02912	2.49604	-3.21675	0.00129653	0.0531576	NA
511	Sobic.007G076800	38.686	7.13422	2.21951	3.21432	0.00130752	0.0535071	XP_002445218.1 B3 domain-containing protein Os06g0194400 [Sorghum bicolor]
196	Sobic.002G339666	146.462	-3.53159	1.09891	-3.21372	0.00131029	0.0535196	NA
572	Sobic.008G133400	303.634	-3.2384	1.00814	-3.21225	0.00131698	0.0535911	XP_021321896.1 UNC93-like protein 3 isoform X1 [Sorghum bicolor]
681	Sobic.010G266100	25.1989	-8.01721	2.49561	-3.21252	0.00131574	0.0535911	NA
310	Sobic.004G005400	86.0532	3.88498	1.21041	3.20964	0.00132899	0.0539785	XP_002451361.1 DExH-box ATP-dependent RNA helicase DExH12 [Sorghum bicolor]
8	Sobic.001G039600	132.921	3.55778	1.10997	3.20531	0.00134918	0.0544854	NA
140	Sobic.002G082900	186.167	-3.42329	1.06825	-3.20459	0.00135256	0.0544854	XP_002461714.1 amino acid transporter ANT1 [Sorghum bicolor]
388	Sobic.005G038300	23.5098	7.96585	2.48601	3.20427	0.00135403	0.0544854	XP_021316865.1 uncharacterized protein LOC8070635 isoform X2 [Sorghum bicolor]
402	Sobic.005G111800	21.5752	-8.50143	2.65231	-3.2053	0.00134924	0.0544854	AAX96698.1 hypothetical protein [Oryza sativa Japonica Group]
642	Sobic.010G082900	36.7561	8.91712	2.78142	3.20596	0.00134612	0.0544854	XP_002439389.2 U4/U6 small nuclear ribonucleoprotein PRP4-like protein [Sorghum bicolor]
543	Sobic.008G024200	191.414	3.11099	0.971407	3.20256	0.00136213	0.0547096	XP_002441773.2 uncharacterized protein LOC8067154 [Sorghum bicolor]
647	Sobic.010G112500	22.3554	-8.32068	2.59889	-3.20162	0.00136655	0.0547859	XP_021304243.1 uncharacterized protein LOC110430714 [Sorghum bicolor]
165	Sobic.002G199300	27.8052	-7.91988	2.47467	-3.20037	0.0013725	0.0549227	NA
174	Sobic.002G261100	196.474	3.79965	1.18911	3.19537	0.00139649	0.0557801	XP_002460505.1 uncharacterized protein LOC8058985 [Sorghum bicolor]
297	Sobic.003G416100	33.3077	-8.33475	2.61102	-3.19214	0.00141222	0.0563044	XP_002459042.1 flowering-promoting factor 1-like protein 2 [Sorghum bicolor]
97	Sobic.001G397800	26.3801	7.63843	2.39576	3.18831	0.00143106	0.0569508	XP_021306779.1 BRCT domain-containing protein At4g02110 isoform X4 [Sorghum bicolor]
251	Sobic.003G200200	2051.38	2.35116	0.737724	3.18705	0.00143733	0.0570959	XP_021312056.1 serine/threonine-protein phosphatase 6 regulatory subunit 3 isoform X1 [Sorghum bicolor]
410	Sobic.005G135533	35.9119	-9.14871	2.87218	-3.18528	0.00144612	0.0573398	XP_021307504.1 uncharacterized protein LOC110431962 isoform X1 [Sorghum bicolor]
170	Sobic.002G226500	19.6665	8.24385	2.58922	3.18391	0.00145301	0.0575077	XP_002460341.1 uncharacterized protein LOC8083224 [Sorghum bicolor]
470	Sobic.006G170300	30.5698	7.94077	2.49678	3.1804	0.0014707	0.0579964	XP_002446902.1 carotenoid cleavage dioxygenase 7
627	Sobic.009G239101	21.403	-8.46573	2.66178	-3.18048	0.0014703	0.0579964	XP_021310926.1 protein FAR1-RELATED SEQUENCE 11 [Sorghum bicolor]
18	Sobic.001G065800	381.111	3.22251	1.01499	3.17493	0.00149875	0.0588883	XP_002463778.1 probable glutathione S-transferase GSTU1 [Sorghum bicolor]
673	Sobic.010G197300	23.0788	-8.17507	2.57475	-3.1751	0.00149785	0.0588883	XP_002438700.1 pentatricopeptide repeat-containing protein At4g16470 [Sorghum bicolor]
28	Sobic.001G092600	30.3248	-8.74193	2.7574	-3.17035	0.00152256	0.0597157	XP_002466473.1 BI1-like protein [Sorghum bicolor]
437	Sobic.006G009600	31.0132	-7.23695	2.28358	-3.16912	0.001529	0.0598602	XP_021319638.1 uncharacterized protein LOC8065970 [Sorghum bicolor]
451	Sobic.006G100000	68.8952	4.82774	1.5247	3.16636	0.0015436	0.0603227	XP_002446580.1 pentatricopeptide repeat-containing protein At5g09450
51	Sobic.001G227850	74.9568	5.67764	1.79454	3.16385	0.00155697	0.0607359	NA
286	Sobic.003G346100	175.267	-3.47912	1.09993	-3.16303	0.00156137	0.0607981	XP_021312701.1 interactor of constitutive active ROPs 2
176	Sobic.002G265200	27.0873	-7.74593	2.44986	-3.16178	0.00156807	0.0609497	XP_002460529.1 formin-like protein 15 [Sorghum bicolor]
279	Sobic.003G282901	60.9137	-4.05708	1.28345	-3.16106	0.00157194	0.0609906	XP_002456279.1 protein kri1 [Sorghum bicolor]
53	Sobic.001G229300	247.531	3.55115	1.12406	3.15922	0.00158191	0.0612679	XP_021306471.1 uncharacterized protein LOC110431618 isoform X1 [Sorghum bicolor]
104	Sobic.001G444700	27.298	7.86645	2.49218	3.15645	0.00159702	0.061743	XP_020402698.1 peroxidase A2 isoform X1 [Zea mays]
242	Sobic.003G178400	46.5765	-5.82176	1.84667	-3.15258	0.00161836	0.0624565	NA
359	Sobic.004G244700	55.2884	6.82847	2.1675	3.15039	0.00163052	0.0628142	NA
57	Sobic.001G243732	64.2924	-6.92888	2.2004	-3.14891	0.0016388	0.0630211	NP_001145634.1 uncharacterized protein LOC100279121 precursor [Zea mays]
322	Sobic.004G068350	488.443	-3.27932	1.04215	-3.14669	0.0016513	0.0633895	NA
212	Sobic.003G065600	39.6187	5.6206	1.78703	3.14522	0.00165964	0.0635971	XP_021311275.1 probable carboxylesterase 15 [Sorghum bicolor]
106	Sobic.001G466300	69.3834	-5.35471	1.70383	-3.14274	0.00167372	0.0640235	XP_002465687.1 yrdC domain-containing protein
456	Sobic.006G120000	24.6371	-8.4605	2.69442	-3.14001	0.00168944	0.0645109	XP_002446667.1 BTB/POZ domain-containing protein At1g67900 [Sorghum bicolor]
459	Sobic.006G136200	32.8022	8.86981	2.82593	3.13872	0.0016969	0.064682	NA
63	Sobic.001G269000	25.3306	-8.16336	2.60303	-3.1361	0.00171209	0.0651464	AAL75999.1 putative polyprotein [Zea mays]
563	Sobic.008G080900	62.4565	-6.43684	2.05561	-3.13136	0.00174002	0.0660932	XP_002442036.1 uncharacterized protein LOC8058178 [Sorghum bicolor]
671	Sobic.010G181200	62.2747	5.57272	1.78065	3.12959	0.0017505	0.0663751	NA
117	Sobic.002G020700	196.641	3.45902	1.10561	3.12861	0.00175635	0.0664807	XP_021309834.1 phospholipase A-2-activating protein [Sorghum bicolor]
85	Sobic.001G351400	172.435	3.80386	1.21625	3.12752	0.00176285	0.0666106	XP_021306441.1 metacaspase-1-like [Sorghum bicolor]
50	Sobic.001G221400	73.2351	-4.2519	1.3599	-3.12662	0.00176831	0.0667006	AAV31277.1 putative polyprotein [Oryza sativa Japonica Group]
582	Sobic.008G155700	31.3975	8.48633	2.71824	3.122	0.00179626	0.0676374	XP_021321799.1 serine/threonine-protein phosphatase 6 regulatory ankyrin repeat subunit A [Sorghum bicolor]
415	Sobic.005G165032	40.376	-8.64021	2.76809	-3.12136	0.00180016	0.0676667	CAH67713.1 H0512B01.8 [Oryza sativa]
25	Sobic.001G082500	44.1316	9.03729	2.89739	3.11911	0.00181397	0.0679227	XP_002463852.1 isoflavone 3'-hydroxylase [Sorghum bicolor]
189	Sobic.002G326400	54.9172	5.76078	1.84676	3.1194	0.0018122	0.0679227	XP_021309271.1 cysteine-rich receptor-like protein kinase 15 [Sorghum bicolor]
325	Sobic.004G084900	28.4398	-6.79848	2.17989	-3.11872	0.00181637	0.0679227	XP_002451743.1 SPX domain-containing protein 1 [Sorghum bicolor]
46	Sobic.001G207200	643.264	3.45338	1.10928	3.11318	0.00185085	0.069093	AAL75999.1 putative polyprotein [Zea mays]
615	Sobic.009G100050	30.9713	-6.63107	2.13047	-3.1125	0.00185512	0.0691336	NA
348	Sobic.004G175400	28.0699	7.86468	2.52858	3.11032	0.00186887	0.0695264	XP_002448247.2 uncharacterized protein LOC8055923 [Sorghum bicolor]
26	Sobic.001G083500	22.2198	-8.38442	2.69728	-3.10847	0.00188061	0.0698433	XP_002463855.1 lamin-like protein [Sorghum bicolor]
476	Sobic.006G187300	43.2208	8.69827	2.79989	3.10665	0.00189221	0.0701542	XP_002446974.2 GDSL esterase/lipase At5g41890 [Sorghum bicolor]
625	Sobic.009G206800	28.5613	7.64772	2.46312	3.10489	0.00190348	0.0704514	XP_002441423.1 probable WRKY transcription factor 56 [Sorghum bicolor]
449	Sobic.006G089601	34.0449	9.00102	2.90169	3.10199	0.00192225	0.071025	NA
90	Sobic.001G377000	291.664	2.88821	0.93158	3.10034	0.001933	0.0713006	XP_002465296.1 dormancy-associated protein homolog 3 [Sorghum bicolor]
345	Sobic.004G154466	20.7131	8.14375	2.62756	3.09936	0.00193938	0.0714148	RLN18579.1 hypothetical protein [Panicum miliaceum]
466	Sobic.006G160200	727.701	3.16262	1.02092	3.09781	0.00194954	0.0716669	NA
107	Sobic.001G471500	860.131	-2.49082	0.805593	-3.0919	0.00198877	0.0727393	NA
199	Sobic.002G376600	601.399	2.51229	0.812306	3.09279	0.00198283	0.0727393	XP_021308835.1 protein WEAK CHLOROPLAST MOVEMENT UNDER BLUE LIGHT 1-like isoform X1 [Sorghum bicolor]
468	Sobic.006G166400	23.8858	-8.68552	2.8088	-3.09225	0.00198643	0.0727393	XP_002448269.2 uncharacterized protein LOC8055945 [Sorghum bicolor]
216	Sobic.003G079300	21.6217	7.6871	2.49214	3.08454	0.00203869	0.0744395	XP_002457397.1 uncharacterized protein LOC8073334 [Sorghum bicolor]
397	Sobic.005G084300	58.0503	-5.52902	1.79317	-3.08338	0.00204661	0.0744782	XP_002449257.1 chitinase 2 [Sorghum bicolor]
520	Sobic.007G141420	27.6317	-8.7421	2.83495	-3.08369	0.00204451	0.0744782	NA
96	Sobic.001G395700	45.0604	5.75407	1.86773	3.08078	0.00206458	0.0745837	XP_002467978.1 protein trichome birefringence-like 6 [Sorghum bicolor]
184	Sobic.002G314300	248.088	-2.70488	0.878	-3.08073	0.00206497	0.0745837	NA
431	Sobic.005G220300	143.542	-5.59675	1.81714	-3.07998	0.00207015	0.0745837	XP_021317860.1 LOW QUALITY PROTEIN: probable serine/threonine-protein kinase PBL28 [Sorghum bicolor]
434	Sobic.006G003300	334.698	-3.05777	0.992679	-3.08032	0.00206776	0.0745837	NA
450	Sobic.006G091100	67.1901	4.74535	1.54063	3.08013	0.00206908	0.0745837	XP_002447898.1 uncharacterized protein LOC8080346 [Sorghum bicolor]
494	Sobic.006G266000	31.0525	-8.78887	2.85212	-3.08152	0.00205945	0.0745837	XP_002448768.2 pentatricopeptide repeat-containing protein At4g33170 [Sorghum bicolor]
193	Sobic.002G335000	216.139	-2.86662	0.931092	-3.07878	0.00207853	0.074706	OEL13045.1 Mitochondrial pyruvate carrier 4 [Dichanthelium oligosanthes]
586	Sobic.008G164375	24.8351	8.58528	2.78878	3.0785	0.00208043	0.074706	NA
333	Sobic.004G111500	151.121	5.40677	1.75694	3.07738	0.00208832	0.0748655	XP_002453622.1 late embryogenesis abundant protein At3g53040 [Sorghum bicolor]
103	Sobic.001G438800	99.357	-5.10321	1.66075	-3.07284	0.00212035	0.0755076	XP_002465569.1 uncharacterized protein LOC8054353 [Sorghum bicolor]
209	Sobic.003G050100	130.833	-5.12609	1.66871	-3.07188	0.00212712	0.0755076	NA
229	Sobic.003G126200	28.8195	-8.62275	2.80669	-3.07221	0.00212477	0.0755076	XP_002455430.2 protein DETOXIFICATION 27 [Sorghum bicolor]	transmembrane antiporter
539	Sobic.008G010900	35.2864	-7.78684	2.5344	-3.07246	0.00212302	0.0755076	NA
594	Sobic.009G003300	180.214	2.89645	0.942256	3.07395	0.00211241	0.0755076	XP_002440407.1 uncharacterized protein LOC8066592 [Sorghum bicolor]
629	Sobic.010G003700	31.8986	-6.98877	2.27474	-3.07233	0.00212392	0.0755076	XP_002436328.1 scarecrow-like protein 6 [Sorghum bicolor]
192	Sobic.002G331400	20.1369	-8.14818	2.65395	-3.07021	0.00213909	0.0756847	XP_021309276.1 F-box/LRR-repeat protein At5g35995 [Sorghum bicolor]
617	Sobic.009G114200	26.983	8.16165	2.65795	3.07066	0.00213586	0.0756847	XP_021306511.1 protein PHOSPHATE STARVATION RESPONSE 1-like [Sorghum bicolor]
628	Sobic.010G003300	46.384	-5.72429	1.86511	-3.06915	0.00214671	0.0758307	XP_021304542.1 uncharacterized protein LOC8067881 isoform X2 [Sorghum bicolor]
131	Sobic.002G062400	20.3152	-8.12863	2.64981	-3.06762	0.00215768	0.0760941	AOO77396.1 maturase
358	Sobic.004G225000	117.519	3.53587	1.15288	3.06698	0.00216233	0.0761342	XP_002452497.1 bifunctional nitrilase/nitrile hydratase NIT4 [Sorghum bicolor]
55	Sobic.001G237250	37.2909	8.51469	2.77709	3.06605	0.00216905	0.076174	NA
195	Sobic.002G336700	62.8449	-7.59399	2.47733	-3.06539	0.00217384	0.076174	XP_020396908.1 equilibrative nucleotide transporter 3 isoform X3 [Zea mays]
427	Sobic.005G210850	106.019	4.16896	1.36002	3.06537	0.00217399	0.076174	XP_021316681.1 uncharacterized protein LOC110435459 isoform X2 [Sorghum bicolor]
675	Sobic.010G208600	46.1822	8.30573	2.71112	3.06358	0.00218705	0.076508	XP_014755945.1 uncharacterized protein LOC100824808 [Brachypodium distachyon]
472	Sobic.006G175700	177.482	-4.69641	1.53386	-3.06182	0.00219997	0.076836	XP_021318741.1 anthocyanin regulatory R-S protein isoform X2 [Sorghum bicolor]
302	Sobic.003G423500	32.5016	-8.07868	2.63955	-3.06063	0.00220874	0.0770183	XP_002456922.1 glucan endo-1
462	Sobic.006G141400	4996.82	2.66629	0.871923	3.05794	0.00222863	0.0775872	XP_002448144.1 protein trichome berefringence-like 7 [Sorghum bicolor]
254	Sobic.003G203500	793.17	-2.40928	0.789175	-3.05291	0.00226634	0.0787734	CBH32543.1 retinal dehydrogenase
95	Sobic.001G393101	31.3019	8.9894	2.9458	3.05159	0.00227629	0.0788667	NA
620	Sobic.009G166801	411.876	2.6875	0.880609	3.05187	0.00227424	0.0788667	XP_021303914.1 uncharacterized protein LOC110430511 [Sorghum bicolor]
19	Sobic.001G066500	849.941	2.84889	0.933752	3.05101	0.00228071	0.0788936	XP_021307663.1 uncharacterized protein LOC8084146 isoform X1 [Sorghum bicolor]
282	Sobic.003G311500	559.827	-2.48243	0.813999	-3.04967	0.00229091	0.0791203	XP_021313754.1 double-stranded RNA-binding protein 1 [Sorghum bicolor]
183	Sobic.002G312900	439.518	3.53464	1.15931	3.04892	0.00229665	0.0791926	XP_002462907.1 probable protein phosphatase 2C 62 [Sorghum bicolor]
444	Sobic.006G067800	1354.75	3.51644	1.15388	3.0475	0.00230757	0.0794427	XP_002447780.1 60S acidic ribosomal protein P2A [Sorghum bicolor]
250	Sobic.003G196400	241.931	2.86131	0.939271	3.04631	0.00231672	0.0796314	XP_008672182.1 hypothetical protein isoform X2 [Zea mays]
379	Sobic.005G008001	21.4961	-8.52007	2.79784	-3.04523	0.00232499	0.0797012	XP_021317034.1 uncharacterized protein LOC8067591 [Sorghum bicolor]
602	Sobic.009G014100	91.7429	-4.00756	1.31607	-3.04509	0.0023261	0.0797012	NA
478	Sobic.006G192400	75.8382	-6.43724	2.11478	-3.04393	0.00233507	0.0798822	XP_021318409.1 uncharacterized protein LOC8057698 [Sorghum bicolor]
622	Sobic.009G188100	132.922	3.47878	1.14471	3.039	0.00237368	0.081075	XP_021303570.1 receptor-like serine/threonine-protein kinase SD1-8 isoform X1 [Sorghum bicolor]
365	Sobic.004G297800	24.598	-8.72722	2.87685	-3.0336	0.00241652	0.0824087	XP_002452819.1 uncharacterized protein LOC8073973 [Sorghum bicolor]
461	Sobic.006G139501	24.882	-8.66868	2.86145	-3.02947	0.00244979	0.0834122	XP_002446758.1 uncharacterized protein At4g06744 [Sorghum bicolor]
387	Sobic.005G037400	34.4512	8.46408	2.796	3.02721	0.00246822	0.0836456	XP_006655824.1 caffeoyl-CoA O-methyltransferase 1 [Oryza brachyantha]
493	Sobic.006G249300	31.5907	8.77327	2.89741	3.02796	0.00246208	0.0836456	XP_002447259.1 uncharacterized protein LOC8070261 [Sorghum bicolor]
591	Sobic.008G181801	49.5941	-5.37429	1.7751	-3.0276	0.00246501	0.0836456	NA
471	Sobic.006G174050	649.091	3.57556	1.18184	3.02542	0.00248285	0.0840102	AAT42164.1 putative small nuclear ribonucleoprotein [Sorghum bicolor]
349	Sobic.004G189500	179.008	-4.42952	1.46463	-3.02433	0.00249184	0.0841832	XP_002454052.1 uncharacterized protein LOC8072623 [Sorghum bicolor]
473	Sobic.006G178100	535.976	-2.99816	0.991714	-3.02321	0.00250111	0.0843647	OEL13266.1 putative tRNA pseudouridine synthase Pus10 [Dichanthelium oligosanthes]
233	Sobic.003G136400	19.2176	-7.94822	2.63004	-3.02209	0.00251033	0.0845444	XP_002457683.1 death domain-associated protein 6 [Sorghum bicolor]
244	Sobic.003G185400	162.771	-2.97489	0.984991	-3.02022	0.0025259	0.0849368	NA
287	Sobic.003G356600	20.2405	7.63461	2.53128	3.0161	0.00256045	0.0859652	XP_002458766.1 rop guanine nucleotide exchange factor 7 [Sorghum bicolor]
659	Sobic.010G148750	24.6765	8.6514	2.86941	3.01504	0.00256944	0.0861338	XP_021319613.1 uncharacterized protein LOC110436584 [Sorghum bicolor]
133	Sobic.002G065300	46.0179	-7.26884	2.41126	-3.01454	0.00257367	0.0861423	XP_020397064.1 subtilisin-like protease SBT4.3 [Zea mays]
172	Sobic.002G255901	46.8803	-5.48904	1.82191	-3.01279	0.0025886	0.0865088	XP_002462619.2 uncharacterized protein LOC8058965 [Sorghum bicolor]
509	Sobic.007G073900	299.924	-2.57536	0.855677	-3.00973	0.00261476	0.0872486	XP_002444013.1 histone-lysine N-methyltransferase ASHR2 [Sorghum bicolor]
324	Sobic.004G079800	176.423	4.61162	1.53393	3.0064	0.0026436	0.0880753	NP_001130755.1 uncharacterized protein LOC100191859 [Zea mays]
386	Sobic.005G020200	23.302	-8.64932	2.87862	-3.00467	0.00265867	0.0884415	XP_021316858.1 transcription factor MYB30 [Sorghum bicolor]
222	Sobic.003G097200	432.38	2.93661	0.977759	3.00341	0.00266968	0.0885797	XP_021313022.1 rust resistance kinase Lr10-like [Sorghum bicolor]
366	Sobic.004G298700	245.585	-3.21461	1.07037	-3.00327	0.00267099	0.0885797	XP_002454557.1 glycine-rich cell wall structural protein 2 [Sorghum bicolor]
211	Sobic.003G053750	27.1293	8.55962	2.8517	3.00159	0.00268574	0.0889328	XP_002457275.1 autophagy-related protein 18d isoform X2 [Sorghum bicolor]
608	Sobic.009G036800	60.5646	4.8878	1.62907	3.00036	0.00269658	0.0891556	XP_021302593.1 uncharacterized protein LOC8071297 isoform X2 [Sorghum bicolor]
99	Sobic.001G402800	25.1038	8.57419	2.85842	2.99962	0.00270315	0.0891851	XP_021317701.1 uncharacterized protein LOC110435917 [Sorghum bicolor]
116	Sobic.002G019100	26.2445	-8.68157	2.8945	-2.99934	0.00270569	0.0891851	XP_002461378.2 probable fucosyltransferase 8 [Sorghum bicolor]
318	Sobic.004G040100	27.0802	-8.71144	2.90651	-2.99722	0.00272457	0.0896241	XP_021314369.1 protein CHLOROPLAST IMPORT APPARATUS 2 isoform X2 [Sorghum bicolor]
371	Sobic.004G332800	47.9738	4.94317	1.64942	2.99691	0.00272728	0.0896241	XP_002454718.1 F-box/LRR-repeat protein 14 [Sorghum bicolor]
93	Sobic.001G381800	229.342	3.86699	1.2924	2.9921	0.00277064	0.0907741	XP_002467911.1 protein ENHANCED DISEASE RESISTANCE 4 [Sorghum bicolor]
484	Sobic.006G212400	18.6353	-7.75374	2.59118	-2.99236	0.00276828	0.0907741	XP_002447084.1 polygalacturonase QRT3 [Sorghum bicolor]
360	Sobic.004G269100	19.7253	-8.4003	2.80845	-2.99108	0.0027799	0.0909402	XP_002452689.1 rop guanine nucleotide exchange factor 14 [Sorghum bicolor]
497	Sobic.007G007400	24.0775	-8.57486	2.86822	-2.98961	0.00279334	0.091242	XP_021320547.1 uncharacterized protein LOC8068524 [Sorghum bicolor]
234	Sobic.003G137400	119.796	3.12277	1.04501	2.98827	0.00280565	0.0913691	NP_001151840.1 hydrophobic protein LTI6B [Zea mays]
443	Sobic.006G054600	26.1494	-8.59517	2.87622	-2.98835	0.00280485	0.0913691	XP_002446324.1 glutaredoxin-C3 [Sorghum bicolor]
75	Sobic.001G307500	17.3535	-7.91406	2.65056	-2.98581	0.00282827	0.0919676	XP_021307416.1 uncharacterized protein LOC110431922 [Sorghum bicolor]
316	Sobic.004G033800	25.7757	7.1529	2.39832	2.98246	0.00285938	0.0927011	XP_002451501.2 uncharacterized protein LOC8057533 [Sorghum bicolor]
552	Sobic.008G049200	170.006	4.0459	1.35635	2.98292	0.00285511	0.0927011	XP_021301457.1 abscisic stress-ripening protein 1-like [Sorghum bicolor]
438	Sobic.006G013600	297.02	-4.29315	1.44065	-2.98	0.00288247	0.0931713	XP_021318649.1 uncharacterized protein LOC8080290 [Sorghum bicolor]
612	Sobic.009G043000	97.4254	-4.27109	1.43319	-2.98013	0.00288125	0.0931713	XP_021303907.1 thioredoxin F
43	Sobic.001G198100	471.42	4.36658	1.46577	2.97905	0.00289145	0.0933226	XP_002466962.1 probable plastid-lipid-associated protein 10
323	Sobic.004G078100	25.0354	-8.54014	2.86968	-2.97599	0.00292044	0.0941181	NA
396	Sobic.005G077001	22.4826	-8.5221	2.86957	-2.96982	0.00297976	0.0958332	XP_021317623.1 RNA-binding protein CP29B
632	Sobic.010G007900	215.058	-4.55326	1.53332	-2.96954	0.0029825	0.0958332	NA
300	Sobic.003G420700	101.173	-3.64206	1.22851	-2.96461	0.00303067	0.0972369	XP_021311040.1 homeobox protein Hox-A3 [Sorghum bicolor]
317	Sobic.004G034200	229.11	-3.19703	1.07894	-2.96313	0.00304529	0.0975616	XP_021314595.1 protein STRUBBELIG-RECEPTOR FAMILY 3 isoform X2 [Sorghum bicolor]
356	Sobic.004G218900	61.4874	-5.09236	1.71993	-2.9608	0.00306843	0.098158	XP_002454190.1 long-chain-alcohol oxidase FAO2 [Sorghum bicolor]
241	Sobic.003G176350	32.437	-6.95634	2.35318	-2.95614	0.00311517	0.0990889	XP_021313486.1 uncharacterized protein LOC110434107 [Sorghum bicolor]
319	Sobic.004G043001	235.226	2.64656	0.895042	2.95691	0.00310738	0.0990889	XP_002453308.2 uncharacterized protein LOC8069977 isoform X3 [Sorghum bicolor]
321	Sobic.004G057700	47.4845	5.86084	1.98221	2.95672	0.00310926	0.0990889	XP_002451627.1 uncharacterized protein LOC8077185 [Sorghum bicolor]
537	Sobic.008G008801	719.338	4.01486	1.35817	2.95608	0.0031158	0.0990889	XP_021301373.1 LOW QUALITY PROTEIN: probable staphylococcal-like nuclease CAN2 [Sorghum bicolor]
475	Sobic.006G184300	357.062	2.65925	0.900252	2.9539	0.00313788	0.0996449	XP_002446956.1 F-box protein PP2-A13 [Sorghum bicolor]
305	Sobic.003G431000	30.8878	7.50568	2.54145	2.95331	0.00314389	0.0996898	XP_002459121.1 U-box domain-containing protein 14 [Sorghum bicolor]
